# Supplementary material for: Tandem synthesis of 3-allyl-chromones from alkynones and allylic alcohols under metal-free conditions
Source: Royal Society of Chemistry journal article supplement (doi:10.1039/c3cc48259f), 2013-11-05

## Tandem Synthesis of 3-Allyl-chromones from Alkynones and Allylic Alcohols under Metal-free Conditions

Xuesong Wang, Guolin Cheng, Xiuling Cui\*

*Engineering Research Center of Molecular Medicine, Ministry of Education, The Key Laboratory of Xiamen Marine and Gene Drugs, Institutes of Molecular Medicine and School of Biomedical Sciences, Huaqiao University, Xiamen, 361021*

Corresponding author: Xiuling Cui

Tel.: +86-592-6162996. Fax: +86-592-6162996.

E-mail address: [cuixl@hqu.edu.cn](mailto:cuixl@hqu.edu.cn)

Page S2-S8: Materials and Methods. Page S9-S32: the  $^1\text{H}$  NMR and  $^{13}\text{C}$  NMR spectra for compounds **1k**, **1t**, **c** and **3a-3u**.

### List of $^1\text{H}$ NMR and $^{13}\text{C}$ NMR spectra for compounds

|          |                                                    |
|----------|----------------------------------------------------|
| Page S9  | $^1\text{H}$ NMR, $^{13}\text{C}$ NMR of <b>1k</b> |
| Page S10 | $^1\text{H}$ NMR, $^{13}\text{C}$ NMR of <b>1t</b> |
| Page S11 | $^1\text{H}$ NMR, $^{13}\text{C}$ NMR of <b>c</b>  |
| Page S12 | $^1\text{H}$ NMR, $^{13}\text{C}$ NMR of <b>3a</b> |
| Page S13 | $^1\text{H}$ NMR, $^{13}\text{C}$ NMR of <b>3b</b> |
| Page S14 | $^1\text{H}$ NMR, $^{13}\text{C}$ NMR of <b>3c</b> |
| Page S15 | $^1\text{H}$ NMR, $^{13}\text{C}$ NMR of <b>3d</b> |
| Page S16 | $^1\text{H}$ NMR, $^{13}\text{C}$ NMR of <b>3e</b> |
| Page S17 | $^1\text{H}$ NMR, $^{13}\text{C}$ NMR of <b>3f</b> |
| Page S18 | $^1\text{H}$ NMR, $^{13}\text{C}$ NMR of <b>3g</b> |
| Page S19 | $^1\text{H}$ NMR, $^{13}\text{C}$ NMR of <b>3h</b> |
| Page S20 | $^1\text{H}$ NMR, $^{13}\text{C}$ NMR of <b>3i</b> |
| Page S21 | $^1\text{H}$ NMR, $^{13}\text{C}$ NMR of <b>3j</b> |
| Page S22 | $^1\text{H}$ NMR, $^{13}\text{C}$ NMR of <b>3k</b> |
| Page S23 | $^1\text{H}$ NMR, $^{13}\text{C}$ NMR of <b>3l</b> |
| Page S24 | $^1\text{H}$ NMR, $^{13}\text{C}$ NMR of <b>3m</b> |
| Page S25 | $^1\text{H}$ NMR, $^{13}\text{C}$ NMR of <b>3n</b> |
| Page S26 | $^1\text{H}$ NMR, $^{13}\text{C}$ NMR of <b>3o</b> |
| Page S27 | $^1\text{H}$ NMR, $^{13}\text{C}$ NMR of <b>3p</b> |
| Page S28 | $^1\text{H}$ NMR, $^{13}\text{C}$ NMR of <b>3q</b> |
| Page S29 | $^1\text{H}$ NMR, $^{13}\text{C}$ NMR of <b>3r</b> |
| Page S30 | $^1\text{H}$ NMR, $^{13}\text{C}$ NMR of <b>3s</b> |
| Page S31 | $^1\text{H}$ NMR, $^{13}\text{C}$ NMR of <b>3t</b> |
| Page S32 | $^1\text{H}$ NMR, $^{13}\text{C}$ NMR of <b>3u</b> |

## Experimental Section

All commercially available chemicals were obtained from Adamas-beta and used without further purifications. Silica gel was purchased from Qing Dao Hai Yang Chemical Industry Co. All melting points were determined on a Beijing Science Instrument Dianguang Instrument Factory XT4B melting point apparatus and uncorrected.  $^1\text{H}$  and  $^{13}\text{C}$  NMR spectra were measured on a 400 MHz Bruker spectrometer ( $^1\text{H}$  400 MHz,  $^{13}\text{C}$  100 MHz), using  $\text{CDCl}_3$  as the solvent with tetramethylsilane (TMS) as the internal standard at room temperature. HRMSESI spectra were obtained on Agilent 6450 spectrometer. IR data were recorded on a Nicolet IS10 spectrometer. The products listed below were determined by  $^1\text{H}$ ,  $^{13}\text{C}$  NMR. PE is petroleum ether (60-90 °C).

### General Procedure for the Preparation of alkynones:<sup>1</sup>

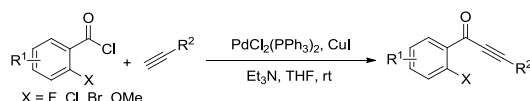

To a solution of the acyl chloride (1.0 mmol) and terminal alkyne (1.1 mmol) in anhydrous THF (5 mL) under  $\text{N}_2$  protection, was added  $\text{PdCl}_2(\text{PPh}_3)_2$  (14 mg, 2 mol %) and  $\text{CuI}$  (7.6 mg, 4 mol %). After stirring for 1 min,  $\text{Et}_3\text{N}$  (1.5 mmol) was added and the mixture was stirred for 15 h at r.t. When the reaction was complete (Monitored by TLC), distilled  $\text{H}_2\text{O}$  was added. The mixture was extracted with  $\text{CH}_2\text{Cl}_2$ . The organic phase was collected, dried ( $\text{Na}_2\text{SO}_4$ ), and concentrated. The residue was purified by column chromatography [silica gel, PE/EtOAc (50:1)].

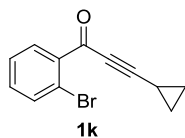

1-(2-bromophenyl)-3-cyclopropylprop-2-yn-1-one (**1k**); 85% yield.

yellow liquid; IR (KBr) 2203, 1649  $\text{cm}^{-1}$ .  $^1\text{H}$  NMR (400 MHz,  $\text{CDCl}_3$ )  $\delta$  ppm 7.92 (m, 1H), 7.64 (dd,  $J = 7.9, 1.1$  Hz, 1H), 7.42-7.38 (m, 1H), 7.35-7.31 (m, 1H), 1.53-1.47 (m, 1H), 1.04-0.99 (m, 4H);  $^{13}\text{C}$  NMR (101 MHz,  $\text{CDCl}_3$ )  $\delta$  ppm 177.3, 137.7, 134.7, 132.9, 132.4, 127.2, 120.8, 102.5, 9.8, 0.1; HRMS  $m/z$  (ESI) calcd for  $\text{C}_{12}\text{H}_9\text{OBr}$  ( $\text{M} + \text{H}$ )<sup>+</sup> 248.9915, found 248.9912.

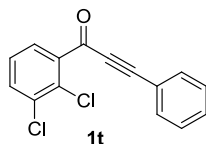

1-(2,3-dichlorophenyl)-3-phenylprop-2-yn-1-one (**1t**); 88% yield.

yellow solid; mp: 74-76 °C; IR (KBr) 2200, 1638  $\text{cm}^{-1}$ ;  $^1\text{H}$  NMR (400 MHz,  $\text{CDCl}_3$ )  $\delta$  ppm 7.91-7.88 (m, 1H), 7.67-7.63 (m, 3H), 7.51-7.47 (m, 1H), 7.43-7.40 (m, 2H), 7.37-7.33 (m, 1H);  $^{13}\text{C}$  NMR (101 MHz,  $\text{CDCl}_3$ )  $\delta$  ppm 176.3, 138.4, 135.0, 133.9, 133.2, 131.5, 131.2, 130.0, 128.7, 127.3, 119.8, 94.7, 88.2; HRMS  $m/z$  (ESI) calcd for  $\text{C}_{15}\text{H}_8\text{OCl}_2$  ( $\text{M} + \text{H}$ )<sup>+</sup> 275.0030, found 275.0027.

### Procedure for the synthesis of intermediate C:

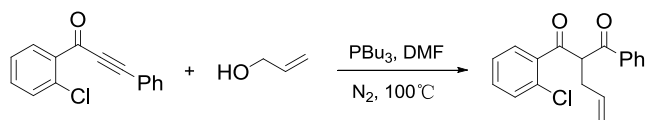

A mixture of *o*-chlorophenylynone (1.0 mmol), allyl alcohol (1.2 mmol) and PBU<sub>3</sub> (0.1 mmol) in *N,N*-dimethylformamide (2 mL) was stirred at 100 °C for 8 h under nitrogen atmosphere (without base). After cooling to room temperature, water was added (10 mL). Then the aqueous solution was extracted with ethyl acetate (3 × 10 mL). The organic phase was dried over anhydrous Na<sub>2</sub>SO<sub>4</sub> and concentrated. The residue was purified by column chromatography [eluent: PE/EtOAc (50:1)] on silica gel to give the compound **C**.

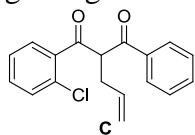

2-allyl-1-(2-chlorophenyl)-3-phenylpropane-1,3-dione (**c**); 94% yield.

yellow liquid; IR (KBr) 3069, 1708, 1676, 1593, 1434, 1263, 1235, 999, 923, 759, 692 cm<sup>-1</sup>; <sup>1</sup>H NMR (400 MHz, CDCl<sub>3</sub>) δ ppm 7.89 (d, 2H), 7.54 (m, 1H), 7.41 (m, 3H), 7.32 (m, 2H), 7.24 (m, 1H), 5.85 (m, 1H), 5.45 (m, 1H), 5.05 (m, 2H), 2.76-2.93 (m, 2H); <sup>13</sup>C NMR (101 MHz, CDCl<sub>3</sub>) δ ppm 197.8, 195.5, 138.5, 136.2, 134.6, 133.5, 131.9, 130.6, 130.3, 129.6, 128.7, 128.5, 127.0, 117.5, 59.8, 33.2; HRMS *m/z* (ESI) calcd for C<sub>18</sub>H<sub>15</sub>O<sub>2</sub>Cl (M + Na)<sup>+</sup> 321.0658, found 321.0660.

### General Procedure for the synthesis of substituted chromones 3a-3u:

A mixture of alkynones (0.5 mmol), allylic alcohol (0.6 mmol), K<sub>2</sub>CO<sub>3</sub> (0.5 mmol) and PBU<sub>3</sub> (0.05 mmol) in *N,N*-dimethylformamide (2 mL) was stirred at 100 °C for 8-24 h under nitrogen. After cooling to room temperature, water was added (10 mL). Then the aqueous solution was extracted with ethyl acetate. The organic phase was dried over anhydrous Na<sub>2</sub>SO<sub>4</sub> and concentrated. The residue was purified by column chromatography [eluent: PE/EtOAc (30:1)] on silica gel to provide the desired product.

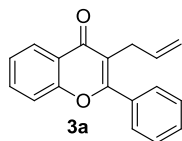

3-allyl-2-phenyl-4*H*-chromen-4-one (**3a**)

yellow solid; mp: 50-52 °C; <sup>1</sup>H NMR (400 MHz, CDCl<sub>3</sub>) δ ppm 8.26 (dd, *J* = 8.0, 1.5 Hz, 1H), 7.70-7.64 (m, 3H), 7.52-7.38 (m, 5H), 6.11-6.05 (m, 1H), 5.05 (m, 2H), 3.32 (d, *J* = 5.70 Hz, 2H); <sup>13</sup>C NMR (101 MHz, CDCl<sub>3</sub>) δ ppm 178.0, 162.3, 156.1, 135.9, 133.4, 133.2, 130.4, 128.5, 128.4, 126.0, 124.8, 122.9, 119.4, 117.9, 115.4, 30.0.

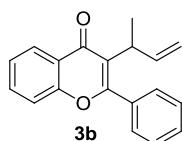

3-(but-3-en-2-yl)-2-phenyl-4*H*-chromen-4-one (**3b**)

yellow solid; mp: 54-56 °C; IR (KBr) 3087, 2966, 1654, 1605, 1426, 1371, 1130, 1074, 927, 854,

767, 692  $\text{cm}^{-1}$ ;  $^1\text{H}$  NMR (400 MHz,  $\text{CDCl}_3$ )  $\delta$  ppm 8.23 (dd,  $J = 7.9, 1.2$  Hz, 1H), 7.65-7.58 (m, 5H), 7.42-7.36 (m, 3H), 6.41-6.32 (m, 1H), 4.96 (t,  $J = 13.6$  Hz, 2H), 3.46 (p,  $J = 6.9$  Hz, 1H), 1.45 (d,  $J = 7.0$  Hz, 3H);  $^{13}\text{C}$  NMR (101 MHz,  $\text{CDCl}_3$ )  $\delta$  ppm 177.8, 162.1, 155.9, 141.5, 133.6, 133.3, 130.2, 128.7, 128.5, 125.9, 124.7, 124.3, 123.9, 117.8, 113.5, 38.0, 18.7; HRMS  $m/z$  (ESI) calcd for  $\text{C}_{19}\text{H}_{16}\text{O}_2$  ( $\text{M} + \text{H}$ ) $^+$  277.1229, found 277.1229.

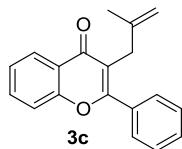

### 3-(2-methylallyl)-2-phenyl-4*H*-chromen-4-one (**3c**)

yellow solid; mp: 58-60 $^{\circ}\text{C}$ ; IR (KBr) 3072, 2978, 1640, 1621, 1466, 1386, 1123, 889, 768, 670  $\text{cm}^{-1}$ ;  $^1\text{H}$  NMR (400 MHz,  $\text{CDCl}_3$ )  $\delta$  ppm 8.26 (dd,  $J = 8.0, 1.6$  Hz, 1H), 7.71-7.65 (m, 3H), 7.52-7.47 (m, 4H), 7.41 (m, 1H), 4.84 (dt,  $J = 2.8, 1.3$  Hz, 1H), 4.59 (s, 1H), 3.23 (s, 2H), 1.84 (s, 3H);  $^{13}\text{C}$  NMR (101 MHz,  $\text{CDCl}_3$ )  $\delta$  ppm 178.1, 162.5, 156.2, 143.9, 133.4, 133.3, 130.4, 128.4, 128.3, 126.1, 124.8, 122.8, 119.6, 117.9, 110.2, 33.5, 23.4; HRMS  $m/z$  (ESI) calcd for  $\text{C}_{19}\text{H}_{16}\text{O}_2$  ( $\text{M} + \text{H}$ ) $^+$  277.1229, found 277.1228.

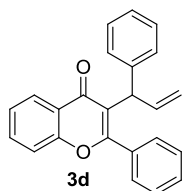

### 2-phenyl-3-(1-phenylallyl)-4*H*-chromen-4-one (**3d**)

yellow solid; mp: 111-113 $^{\circ}\text{C}$ ; IR (KBr) 3059, 3043, 1640, 1624, 1466, 1379, 1219, 903, 758, 698  $\text{cm}^{-1}$ ;  $^1\text{H}$  NMR (400 MHz,  $\text{CDCl}_3$ )  $\delta$  ppm 8.18 (dd,  $J = 8.0, 1.6$  Hz, 1H), 7.66-7.59 (m, 3H), 7.55-7.43 (m, 4H), 7.38-7.34 (m, 1H), 7.26-7.21 (m, 4H), 7.17-7.13 (m, 1H), 6.71 (m, 1H), 5.20 (m, 1H), 5.10-5.05 (m, 1H), 4.67 (d,  $J = 8.1$  Hz, 1H);  $^{13}\text{C}$  NMR (101 MHz,  $\text{CDCl}_3$ )  $\delta$  ppm 177.2, 163.2, 156.0, 142.1, 138.4, 133.5, 133.3, 130.4, 128.7, 128.6, 128.1, 127.2, 126.1, 124.8, 123.9, 123.1, 117.8, 116.8, 48.3; HRMS  $m/z$  (ESI) calcd for  $\text{C}_{24}\text{H}_{18}\text{O}_2$  ( $\text{M} + \text{H}$ ) $^+$  339.1385, found 339.1382.

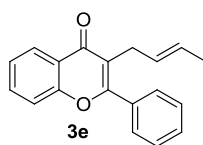

### 3-(but-2-en-1-yl)-2-phenyl-4*H*-chromen-4-one (**3e**)

yellow solid; mp: 74-76 $^{\circ}\text{C}$ ; IR (KBr) 3064, 2931, 1639, 1610, 1469, 1390, 1122, 959, 765  $\text{cm}^{-1}$ ;  $^1\text{H}$  NMR (400 MHz,  $\text{CDCl}_3$ )  $\delta$  ppm 8.26 (d,  $J = 7.7$  Hz, 1H), 7.66 (m, 3H), 7.52-7.38 (m, 5H), 5.68-5.41 (m, 2H), 3.25 (dd,  $J = 30.3, 5.1$  Hz, 2H), 1.65 (t,  $J = 10.1$  Hz, 3H);  $^{13}\text{C}$  NMR (101 MHz,  $\text{CDCl}_3$ )  $\delta$  ppm 178.2, 162.0, 156.2, 133.4, 130.3, 128.6, 128.4, 126.0, 124.7, 123.0, 120.3, 117.9, 28.8, 17.9; HRMS  $m/z$  (ESI) calcd for  $\text{C}_{19}\text{H}_{16}\text{O}_2$  ( $\text{M} + \text{H}$ ) $^+$  277.1229, found 277.1227.

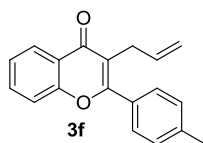

### 3-allyl-2-(*p*-tolyl)-4*H*-chromen-4-one (**3f**)

white solid; mp: 70-72 $^{\circ}\text{C}$ ; IR (KBr) 3073, 2975, 1643, 1613, 1470, 1384, 1133, 903, 759  $\text{cm}^{-1}$ ;  $^1\text{H}$

NMR (400 MHz, CDCl<sub>3</sub>) δ ppm 8.25 (dd, *J* = 8.0, 1.6 Hz, 1H), 7.65 (m, 1H), 7.58 (d, *J* = 8.2 Hz, 2H), 7.46-7.37 (m, 2H), 7.31 (d, *J* = 7.9 Hz, 2H), 6.11-6.01 (m, 1H), 5.06 (m, 2H), 3.33 (dt, *J* = 5.7, 1.7 Hz, 2H), 2.45 (s, 3H); <sup>13</sup>C NMR (101 MHz, CDCl<sub>3</sub>) δ ppm 178.1, 162.6, 156.2, 140.7, 136.1, 133.4, 130.4, 129.1, 128.5, 126.0, 124.7, 122.9, 119.2, 117.9, 115.3, 30.1, 21.5; HRMS *m/z* (ESI) calcd for C<sub>19</sub>H<sub>16</sub>O<sub>2</sub> (M + H)<sup>+</sup> 277.1229, found 277.1225.

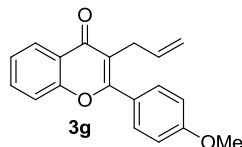

### 3-allyl-2-(4-methoxyphenyl)-4*H*-chromen-4-one (**3g**)

white solid; mp: 64-66 °C; <sup>1</sup>H NMR (400 MHz, CDCl<sub>3</sub>) δ ppm 8.25 (dd, *J* = 7.95 Hz, *J* = 1.40 Hz, 1H), 7.65 (m, 3H), 7.46 (dd, *J* = 10.3, 6.0 Hz, 1H), 7.39 (tt, *J* = 12.2, 3.0 Hz, 1H), 7.01 (m, 2H), 6.09 (m, 1H), 5.07 (m, 2H), 3.89 (s, 3H), 3.35 (dt, *J* = 5.6, 1.7 Hz, 2H); <sup>13</sup>C NMR (101 MHz, CDCl<sub>3</sub>) δ ppm 178.1, 162.3, 161.2, 156.1, 136.1, 133.3, 130.2, 126.0, 125.6, 124.7, 122.8, 118.8, 117.8, 115.3, 113.8, 55.4, 30.2.

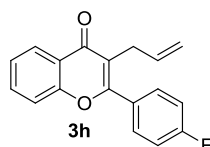

### 3-allyl-2-(4-fluorophenyl)-4*H*-chromen-4-one (**3h**)

yellow solid; mp: 93-95 °C; IR (KBr) 3060, 2960, 1635, 1610, 1508, 1478, 1387, 1238, 1138, 907, 851, 754 cm<sup>-1</sup>; <sup>1</sup>H NMR (400 MHz, CDCl<sub>3</sub>) δ ppm 8.26 (m, 1H), 7.71-7.65 (m, 3H), 7.47-7.39 (m, 2H), 7.22-7.18 (m, 2H), 6.11-6.01 (m, 1H), 5.05 (m, 2H), 3.31 (dt, *J* = 5.6, 1.7 Hz, 2H); <sup>13</sup>C NMR (101 MHz, CDCl<sub>3</sub>) δ ppm 177.9, 163.8 (d, *J*<sub>C-F</sub> = 249.98 Hz), 161.3, 156.1, 135.8, 133.5, 130.7 (d, *J*<sub>C-F</sub> = 8.54 Hz), 129.3 (d, *J*<sub>C-F</sub> = 3.25 Hz), 126.0, 124.9, 122.8, 119.5, 117.8, 115.7, 115.5 (d, *J*<sub>C-F</sub> = 4.47 Hz), 30.0; HRMS *m/z* (ESI) calcd for C<sub>18</sub>H<sub>13</sub>O<sub>2</sub>F (M + H)<sup>+</sup> 281.0978, found 281.0975.

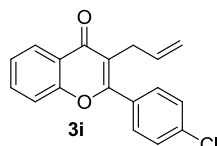

### 3-allyl-2-(4-chlorophenyl)-4*H*-chromen-4-one (**3i**)

yellow solid; mp: 101-103 °C; IR (KBr) 3074, 2959, 1636, 1607, 1468, 1384, 1137, 1095, 907, 828, 754 cm<sup>-1</sup>; <sup>1</sup>H NMR (400 MHz, CDCl<sub>3</sub>) δ ppm 8.26 (dd, *J* = 8.0, 1.6 Hz, 1H), 7.70-7.62 (m, 3H), 7.51-7.39 (m, 4H), 6.05 (m, 1H), 5.05 (m, 2H), 3.30 (dt, *J* = 5.6, 1.7 Hz, 2H); <sup>13</sup>C NMR (101 MHz, CDCl<sub>3</sub>) δ ppm 177.9, 161.1, 156.1, 136.7, 135.8, 133.6, 131.6, 130.0, 128.8, 126.1, 125.0, 122.8, 119.7, 117.9, 115.6, 30.0; HRMS *m/z* (ESI) calcd for C<sub>18</sub>H<sub>13</sub>O<sub>2</sub>Cl (M + H)<sup>+</sup> 297.0682, found 297.0680.

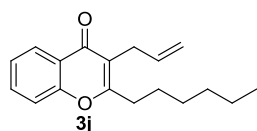

### 3-allyl-2-hexyl-4*H*-chromen-4-one (**3j**)

yellow liquid; IR (KBr) 3077, 2930, 1640, 1575, 1468, 1390, 1227, 1160, 911, 761 cm<sup>-1</sup>; <sup>1</sup>H NMR (400 MHz, CDCl<sub>3</sub>) δ ppm 8.20 (dd, *J* = 8.0, 1.6 Hz, 1H), 7.63-7.59 (m, 1H), 7.40-7.33 (m, 2H), 5.90 (m, 1H), 5.04 (m, 2H), 3.34 (dt, *J* = 6.1, 1.6 Hz, 2H), 2.68 (m, 2H), 1.75 (m, 2H), 1.43-1.28

(m, 6H), 0.90 (m, 3H);  $^{13}\text{C}$  NMR (101 MHz,  $\text{CDCl}_3$ )  $\delta$  ppm 177.4, 166.7, 156.0, 135.5, 133.0, 125.9, 124.5, 122.9, 118.6, 117.6, 115.0, 31.9, 31.5, 29.0, 28.4, 27.2, 22.5, 14.0; HRMS  $m/z$  (ESI) calcd for  $\text{C}_{18}\text{H}_{22}\text{O}_2$  ( $\text{M} + \text{H}$ ) $^+$  271.1698, found 271.1698.

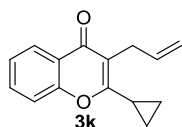

**3-allyl-2-cyclopropyl-4H-chromen-4-one (3k)**

yellow solid; mp: 46-48°C; IR (KBr) 3010, 2969, 1617, 1570, 1466, 1398, 1225, 1169, 1118, 1063, 913, 891, 762, 629  $\text{cm}^{-1}$ ;  $^1\text{H}$  NMR (400 MHz,  $\text{CDCl}_3$ )  $\delta$  ppm 8.19 (dd,  $J = 7.9, 1.5$  Hz, 1H), 7.60-7.56 (m, 1H), 7.35-7.26 (m, 2H), 5.95 (m, 1H), 5.07 (m, 2H), 3.48 (dt,  $J = 6.0, 1.6$  Hz, 2H), 2.12 (tt,  $J = 8.3, 5.0$  Hz, 1H), 1.26 (m, 2H), 1.10-1.05 (m, 2H);  $^{13}\text{C}$  NMR (101 MHz,  $\text{CDCl}_3$ )  $\delta$  ppm 176.6, 165.9, 155.3, 135.4, 132.8, 126.0, 124.5, 123.0, 118.1, 117.2, 115.0, 27.9, 12.0, 8.2; HRMS  $m/z$  (ESI) calcd for  $\text{C}_{15}\text{H}_{14}\text{O}_2$  ( $\text{M} + \text{H}$ ) $^+$  227.1072, found 227.1069.

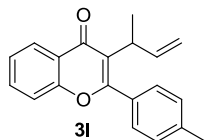

**3-(but-3-en-2-yl)-2-(p-tolyl)-4H-chromen-4-one (3l)**

yellow solid; mp: 80-82°C; IR (KBr) 3067, 2990, 1641, 1621, 1467, 1385, 1221, 1090, 903, 822, 767  $\text{cm}^{-1}$ ;  $^1\text{H}$  NMR (400 MHz,  $\text{CDCl}_3$ )  $\delta$  ppm 8.22 (dd,  $J = 8.0, 1.5$  Hz, 1H), 7.65-7.60 (m, 1H), 7.48 (t,  $J = 9.2$  Hz, 2H), 7.40 (m, 4H), 6.37 (m, 1H), 4.96 (m, 2H), 3.48 (p,  $J = 7.0$  Hz, 1H), 2.45 (s, 3H), 1.45 (d,  $J = 7.1$  Hz, 3H);  $^{13}\text{C}$  NMR (101 MHz,  $\text{CDCl}_3$ )  $\delta$  ppm 177.8, 162.3, 155.9, 141.7, 140.5, 133.2, 130.7, 129.2, 128.6, 125.8, 124.6, 124.1, 123.9, 117.8, 113.4, 38.0, 21.5, 18.8; HRMS  $m/z$  (ESI) calcd for  $\text{C}_{20}\text{H}_{18}\text{O}_2$  ( $\text{M} + \text{H}$ ) $^+$  291.1385, found 291.1383.

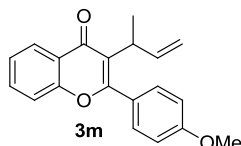

**3-(but-3-en-2-yl)-2-(4-methoxyphenyl)-4H-chromen-4-one (3m)**

yellow solid; mp: 72-74°C; IR (KBr) 3063, 2940, 1639, 1619, 1513, 1466, 1381, 1253, 1176, 838, 775  $\text{cm}^{-1}$ ;  $^1\text{H}$  NMR (400 MHz,  $\text{CDCl}_3$ )  $\delta$  ppm 8.22 (dd,  $J = 8.0, 1.4$  Hz, 1H), 7.64-7.60 (m, 1H), 7.55 (d,  $J = 8.7$  Hz, 2H), 7.41-7.35 (m, 2H), 7.03 (d,  $J = 8.7$  Hz, 2H), 6.38 (m, 1H), 5.00-4.94 (m, 2H), 3.89 (s, 3H), 3.51 (p,  $J = 7.0$  Hz, 1H), 1.46 (d,  $J = 7.0$  Hz, 3H);  $^{13}\text{C}$  NMR (101 MHz,  $\text{CDCl}_3$ )  $\delta$  ppm 177.8, 162.1, 161.0, 155.8, 141.7, 133.2, 130.2, 125.9, 125.8, 124.6, 123.9, 123.8, 117.7, 113.9, 113.4, 55.4, 38.0, 18.8; HRMS  $m/z$  (ESI) calcd for  $\text{C}_{20}\text{H}_{18}\text{O}_3$  ( $\text{M} + \text{H}$ ) $^+$  307.1334, found 307.1333.

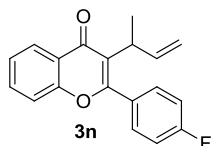

**3-(but-3-en-2-yl)-2-(4-fluorophenyl)-4H-chromen-4-one (3n)**

yellow solid; mp: 54-56°C; IR (KBr) 3067, 2936, 1631, 1615, 1506, 1468, 1380, 1230, 1093, 1013, 917, 841, 762  $\text{cm}^{-1}$ ;  $^1\text{H}$  NMR (400 MHz,  $\text{CDCl}_3$ )  $\delta$  ppm 8.23 (dd,  $J = 7.9, 1.5$  Hz, 1H), 7.66-7.57 (m, 3H), 7.41-7.37 (m, 2H), 7.23-7.19 (m, 2H), 6.35 (m, 1H), 4.96 (m, 2H), 3.43 (m, 1H), 1.45 (d,

$J = 7.1$  Hz, 3H);  $^{13}\text{C}$  NMR (101 MHz,  $\text{CDCl}_3$ )  $\delta$  ppm 177.7, 163.7 (d,  $J_{\text{C-F}} = 249.5$  Hz), 161.1, 155.8, 141.4, 133.4, 130.8 (d,  $J_{\text{C-F}} = 8.43$  Hz), 129.6 (d,  $J_{\text{C-F}} = 4.0$  Hz), 125.9, 124.8, 124.4, 123.8, 117.7, 115.7 (d,  $J_{\text{C-F}} = 21.79$  Hz), 113.6, 38.0, 18.8; HRMS  $m/z$  (ESI) calcd for  $\text{C}_{19}\text{H}_{15}\text{O}_2\text{F}$  ( $\text{M} + \text{H}$ ) $^+$  295.1134, found 295.1136.

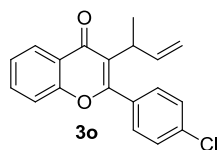

### 3-(but-3-en-2-yl)-2-(4-chlorophenyl)-4*H*-chromen-4-one (**3o**)

yellow solid; mp: 98-100°C; IR (KBr) 3065, 2989, 1642, 1620, 1467, 1383, 1089, 838, 767  $\text{cm}^{-1}$ ;  $^1\text{H}$  NMR (400 MHz,  $\text{CDCl}_3$ )  $\delta$  ppm 8.22 (dd,  $J = 8.0, 1.3$  Hz, 1H), 7.64 (m, 1H), 7.55-7.49 (m, 4H), 7.41-7.37 (m, 2H), 6.35 (m, 1H), 4.95 (m, 2H), 3.42 (m, 1H), 1.45 (d,  $J = 7.1$  Hz, 3H);  $^{13}\text{C}$  NMR (101 MHz,  $\text{CDCl}_3$ )  $\delta$  ppm 177.6, 160.8, 155.8, 141.3, 136.5, 133.5, 131.9, 130.1, 128.8, 125.9, 124.9, 124.5, 123.8, 117.7, 113.7, 38.0, 18.8; HRMS  $m/z$  (ESI) calcd for  $\text{C}_{19}\text{H}_{15}\text{O}_2\text{Cl}$  ( $\text{M} + \text{H}$ ) $^+$  311.0839, found 311.0837.

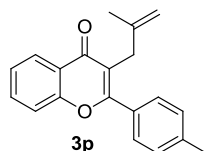

### 3-(2-methylallyl)-2-(*p*-tolyl)-4*H*-chromen-4-one (**3p**)

yellow solid; mp: 86-88°C; IR (KBr) 3071, 2918, 1635, 1618, 1466, 1384, 1337, 1171, 1114, 762  $\text{cm}^{-1}$ ;  $^1\text{H}$  NMR (400 MHz,  $\text{CDCl}_3$ )  $\delta$  ppm 8.25 (dd,  $J = 8.0, 1.6$  Hz, 1H), 7.66 (m, 1H), 7.69 (m, 2H), 7.47 (d,  $J = 8.0$  Hz, 1H), 7.39 (tt,  $J = 7.9, 3.9$  Hz, 1H), 7.30 (m, 2H), 4.83 (dt,  $J = 2.8, 1.3$  Hz, 1H), 4.59 (d,  $J = 0.8$  Hz, 1H), 3.23 (s, 2H), 2.44 (s, 3H), 1.84 (s, 3H);  $^{13}\text{C}$  NMR (101 MHz,  $\text{CDCl}_3$ )  $\delta$  ppm 178.1, 162.6, 156.2, 143.9, 140.7, 133.3, 130.5, 129.1, 128.3, 126.1, 124.7, 122.8, 119.3, 117.9, 110.2, 33.6, 23.4, 21.5; HRMS  $m/z$  (ESI) calcd for  $\text{C}_{20}\text{H}_{18}\text{O}_2$  ( $\text{M} + \text{H}$ ) $^+$  291.1385, found 291.1384.

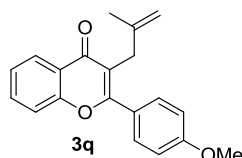

### 2-(4-methoxyphenyl)-3-(2-methylallyl)-4*H*-chromen-4-one (**3q**)

white solid; mp: 100-102°C; IR (KBr) 3079, 3004, 1637, 1608, 1510, 1466, 1387, 1253, 1178, 1028, 836, 762  $\text{cm}^{-1}$ ;  $^1\text{H}$  NMR (400 MHz,  $\text{CDCl}_3$ )  $\delta$  ppm 8.25 (dd,  $J = 8.0, 1.5$  Hz, 1H), 7.68-7.63 (m, 3H), 7.46 (t,  $J = 7.4$  Hz, 1H), 7.41-7.37 (m, 1H), 7.00 (m, 2H), 4.85 (m, 1H), 4.60 (s, 1H), 3.88 (s, 3H), 3.24 (s, 2H), 1.86 (s, 3H);  $^{13}\text{C}$  NMR (101 MHz,  $\text{CDCl}_3$ )  $\delta$  ppm 178.1, 162.4, 161.2, 156.1, 144.0, 133.3, 130.0, 126.1, 125.6, 124.7, 122.8, 118.9, 117.8, 113.8, 110.2, 55.4, 33.7, 23.5; HRMS  $m/z$  (ESI) calcd for  $\text{C}_{20}\text{H}_{18}\text{O}_3$  ( $\text{M} + \text{H}$ ) $^+$  307.1334, found 307.1331.

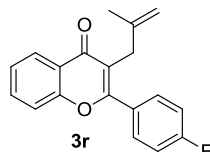

### 2-(4-fluorophenyl)-3-(2-methylallyl)-4*H*-chromen-4-one (**3r**)

yellow solid; mp: 76-78°C; IR (KBr) 3061, 2967, 1637, 1605, 1508, 1469, 1382, 1227, 1163, 854, 758  $\text{cm}^{-1}$ ;  $^1\text{H}$  NMR (400 MHz,  $\text{CDCl}_3$ )  $\delta$  ppm 8.26 (m, 1H), 7.73-7.66 (m, 3H), 7.47 (m, 1H),



7.43-7.39 (m, 1H), 7.18 (m, 2H), 4.84 (m, 1H), 4.58 (d,  $J = 0.7$  Hz, 1H), 3.21 (s, 2H), 1.85 (s, 3H);  $^{13}\text{C}$  NMR (101 MHz,  $\text{CDCl}_3$ )  $\delta$  ppm 177.9, 163.8 (d,  $J_{\text{C-F}} = 249.9$  Hz), 161.4, 156.1, 143.8, 133.5, 130.5 (d,  $J_{\text{C-F}} = 8.49$  Hz), 129.4, 125.5 (d,  $J_{\text{C-F}} = 123.9$  Hz), 122.7, 119.5, 117.8, 115.7 (d,  $J_{\text{C-F}} = 21.66$  Hz), 115.5, 110.3, 33.5, 23.4; HRMS  $m/z$  (ESI) calcd for  $\text{C}_{19}\text{H}_{15}\text{O}_2\text{F}$  ( $\text{M} + \text{H}$ ) $^+$  295.1134, found 295.1135.

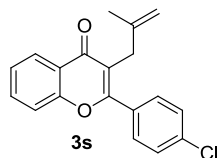

### 2-(4-chlorophenyl)-3-(2-methylallyl)-4H-chromen-4-one (**3s**)

white solid; mp: 112-114°C; IR (KBr) 3076, 2890, 1638, 1619, 1464, 1385, 1126, 1091, 839, 764  $\text{cm}^{-1}$ ;  $^1\text{H}$  NMR (400 MHz,  $\text{CDCl}_3$ )  $\delta$  ppm 8.25 (dd,  $J = 8.0, 1.6$  Hz, 1H), 7.70-7.64 (m, 3H), 7.49-7.46 (m, 3H), 7.41 (t,  $J = 7.6$  Hz, 1H), 4.84 (dt,  $J = 2.7, 1.3$  Hz, 1H), 4.58 (d,  $J = 0.6$  Hz, 1H), 3.21 (s, 2H), 1.84 (s, 3H);  $^{13}\text{C}$  NMR (101 MHz,  $\text{CDCl}_3$ )  $\delta$  ppm 177.9, 161.2, 156.1, 143.8, 136.6, 133.6, 131.6, 129.7, 128.8, 126.2, 125.0, 122.8, 119.7, 117.8, 110.4, 33.5, 23.4; HRMS  $m/z$  (ESI) calcd for  $\text{C}_{19}\text{H}_{15}\text{O}_2\text{Cl}$  ( $\text{M} + \text{H}$ ) $^+$  311.0839, found 311.0836.

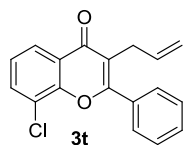

### 3-allyl-8-chloro-2-phenyl-4H-chromen-4-one (**3t**)

yellow solid; mp: 98-100°C; IR (KBr) 3065, 2978, 1650, 1623, 1439, 1379, 1166, 1115, 913, 768, 700  $\text{cm}^{-1}$ ;  $^1\text{H}$  NMR (400 MHz,  $\text{CDCl}_3$ )  $\delta$  ppm 8.16 (m, 1H), 7.78-7.72 (m, 3H), 7.53 (m, 3H), 7.34 (m, 1H), 6.08 (m, 1H), 5.08 (m, 2H), 3.36 (dt,  $J = 5.6, 1.7$  Hz, 2H);  $^{13}\text{C}$  NMR (101 MHz,  $\text{CDCl}_3$ )  $\delta$  ppm 177.6, 162.2, 151.9, 135.6, 133.6, 132.7, 130.7, 128.8, 128.5, 124.8, 124.6, 124.1, 123.0, 119.6, 115.7, 30.0; HRMS  $m/z$  (ESI) calcd for  $\text{C}_{18}\text{H}_{13}\text{O}_2\text{Cl}$  ( $\text{M} + \text{H}$ ) $^+$  297.0682, found 297.0680.

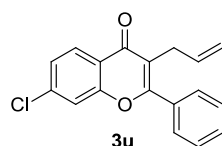

### 3-(but-3-en-2-yl)-7-chloro-2-phenyl-4H-chromen-4-one (**3u**)

yellow solid; mp: 81-83°C; IR (KBr) 3087, 2966, 1655, 1605, 1427, 1371, 1130, 1075, 927, 854, 767, 692  $\text{cm}^{-1}$ ;  $^1\text{H}$  NMR (400 MHz,  $\text{CDCl}_3$ )  $\delta$  ppm 8.19 (d,  $J = 8.6$  Hz, 1H), 7.66 (m, 2H), 7.53-7.49 (m, 4H), 7.36 (m, 1H), 6.04 (m, 1H), 5.07 (m, 2H), 3.30 (dt,  $J = 5.7, 1.7$  Hz, 2H);  $^{13}\text{C}$  NMR (101 MHz,  $\text{CDCl}_3$ )  $\delta$  ppm 177.3, 162.5, 156.3, 139.5, 135.7, 132.8, 130.6, 128.5, 128.5, 127.4, 125.7, 121.4, 119.8, 117.9, 115.6, 30.0; HRMS  $m/z$  (ESI) calcd for  $\text{C}_{18}\text{H}_{13}\text{O}_2\text{Cl}$  ( $\text{M} + \text{H}$ ) $^+$  297.0682, found 297.0679.

1 (a) V. O. Iaroshenko, S. Mkrtychyan and A. Villinger, *Synthesis*, 2013, **45**, 208; (b) Z. She, D. Niu, L. Chen, M. A. Gunawan, X. Shanja, W. H. Hersh and Y. Chen, *J. org. chem.* 2012, **77**, 3627. (c) S. S. Palimkar, P. H. Kumar, N. R. Jogdand, T. Daniel, R. J. Lahoti and K. V. Srinivasan, *Tetrahedron lett.*, 2012, **47**, 5527. (d) S. Santra, K. Dhara, P. Ranjan, P. Bera, J. Dash and S. K. Mandal, *Green Chem.*, 2011, **13**, 3238.



### $^1\text{H}$ NMR spectrum of **1k**

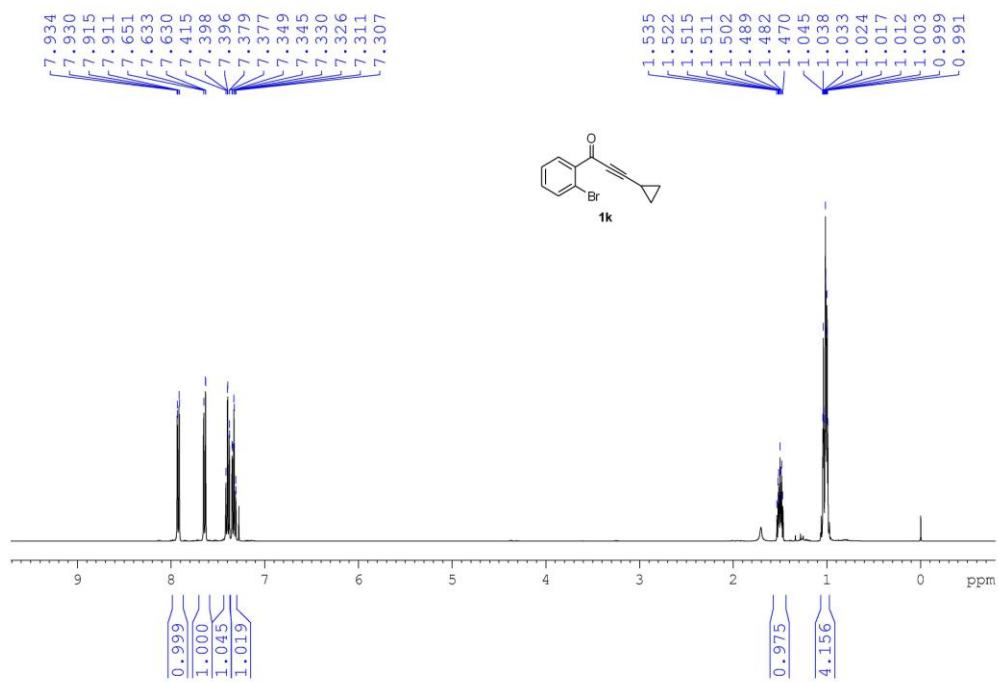

### $^{13}\text{C}$ NMR spectrum of **1k**

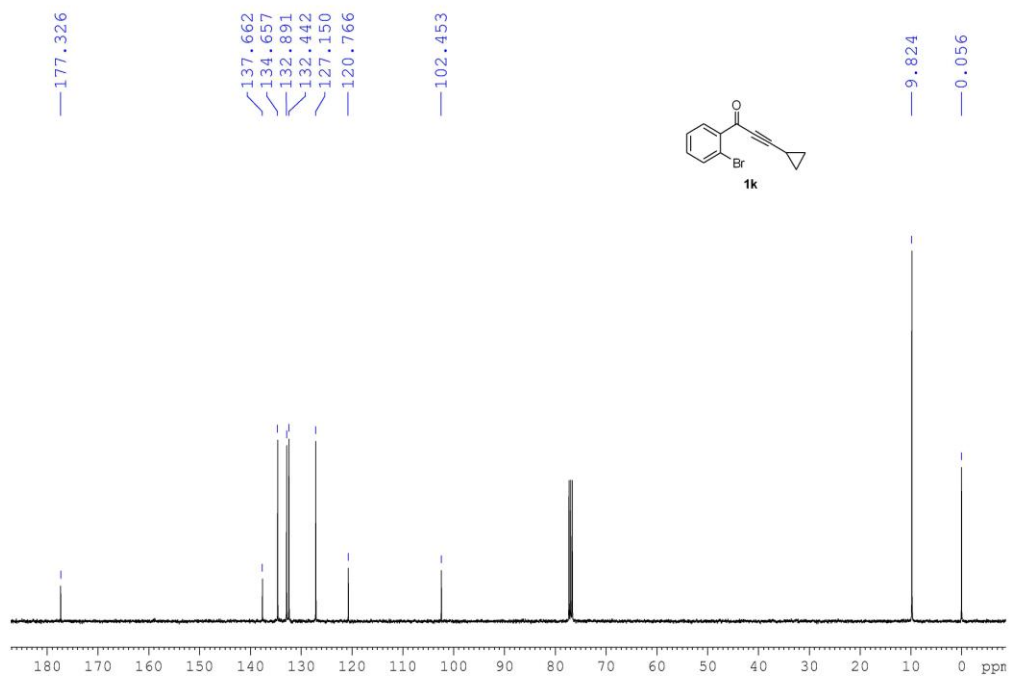

### $^1\text{H}$ NMR spectrum of **1t**

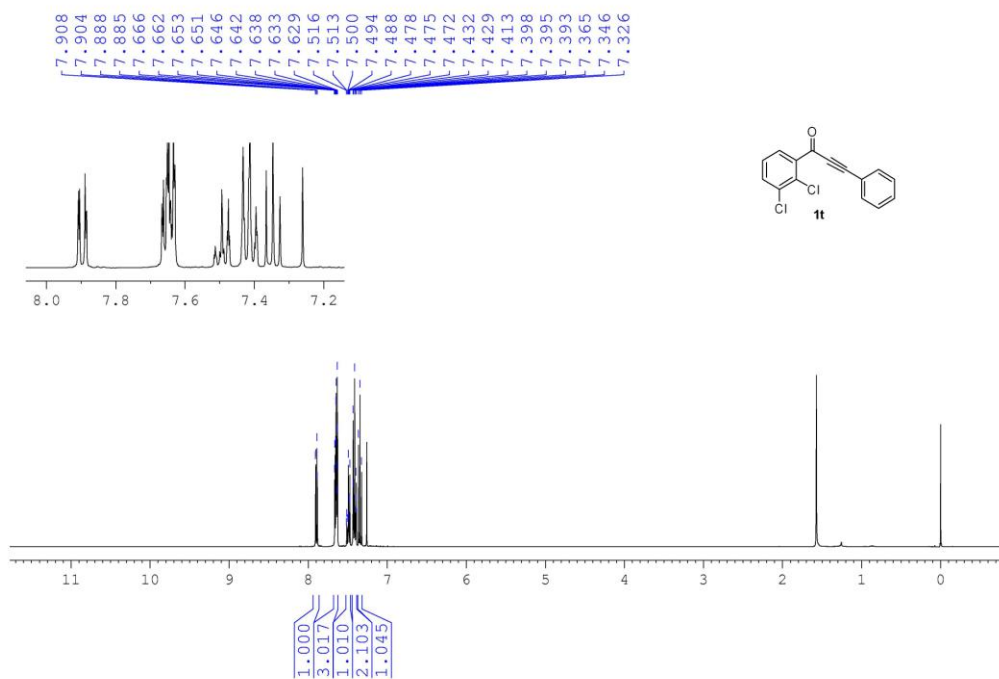

### $^{13}\text{C}$ NMR spectrum of **1t**

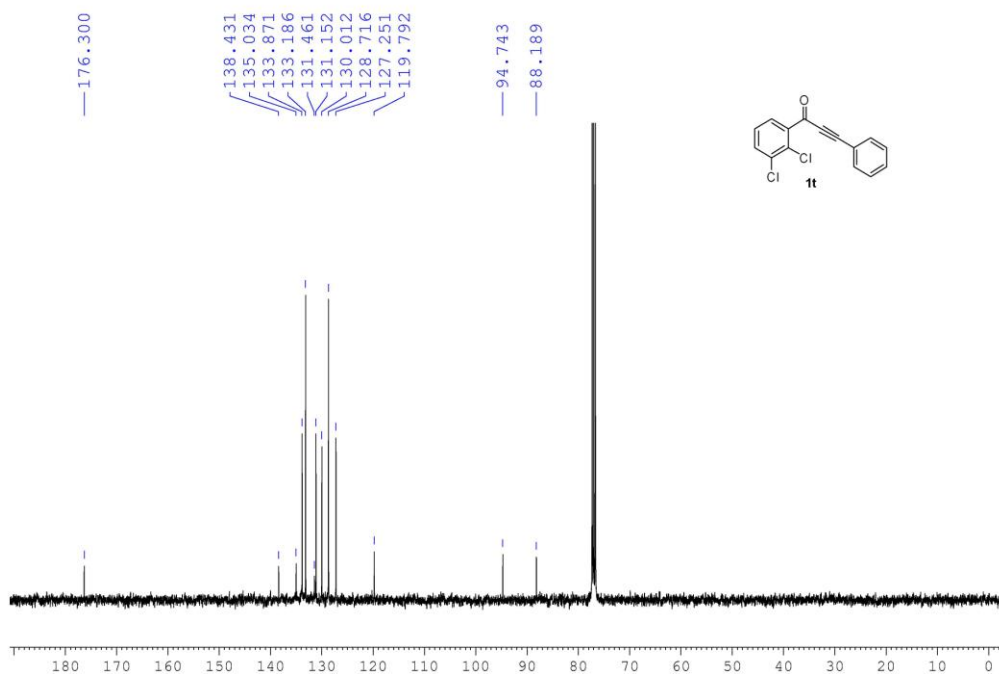

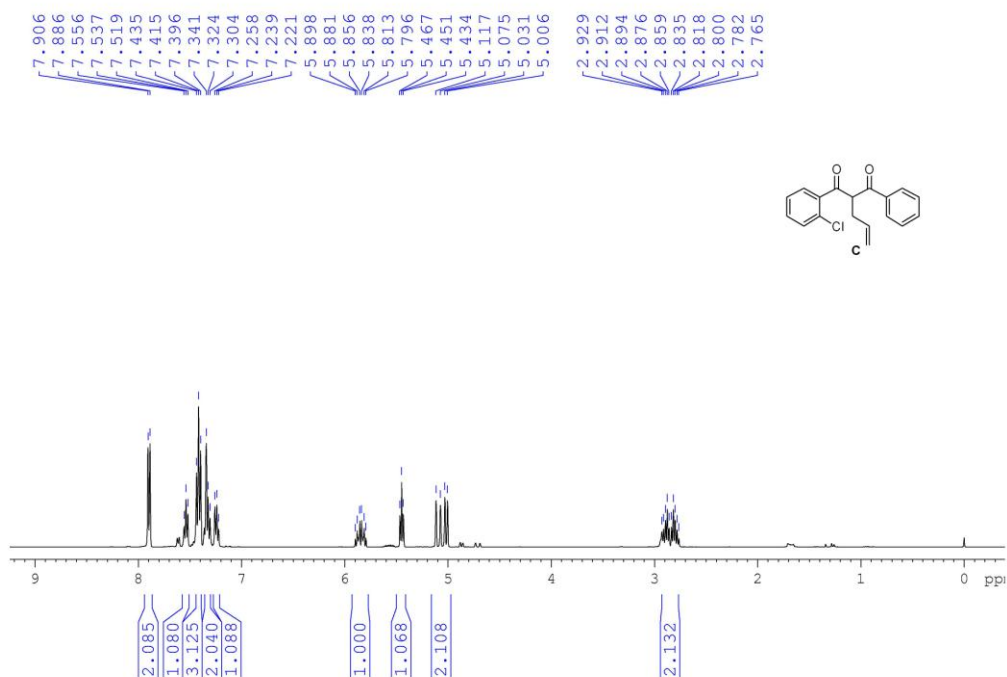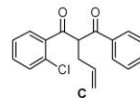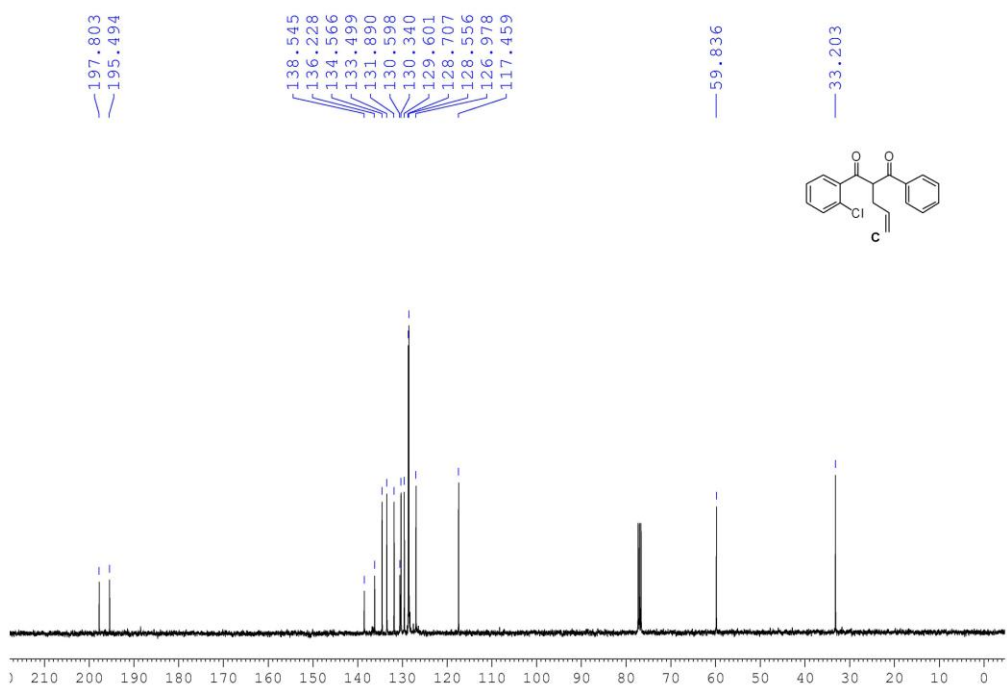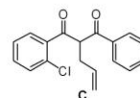

### $^1\text{H}$ NMR spectrum of **3a**

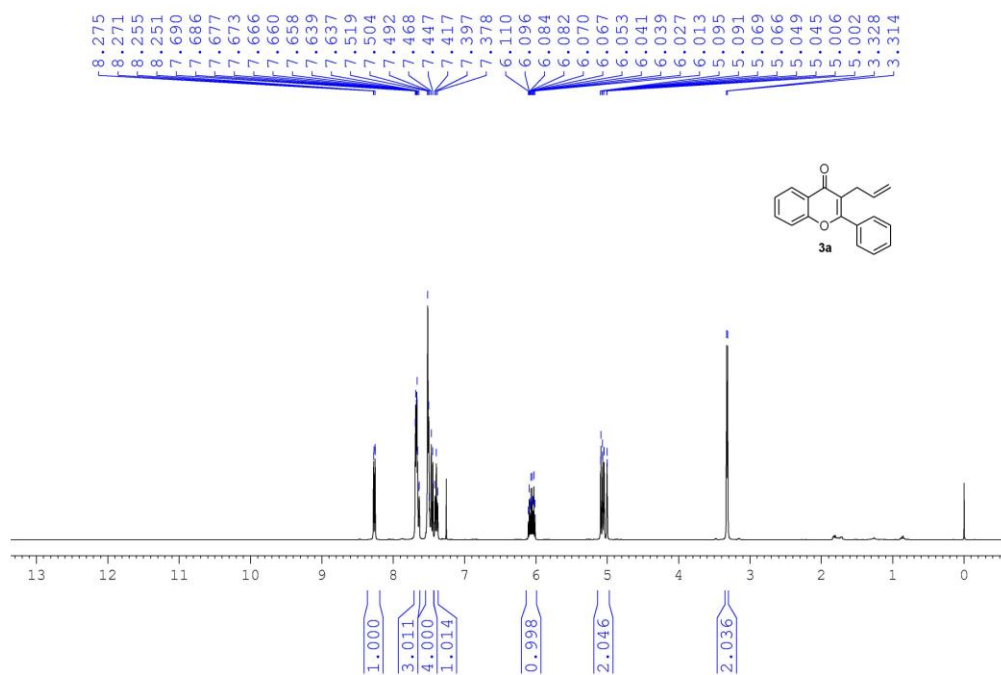

### $^{13}\text{C}$ NMR spectrum of **3a**

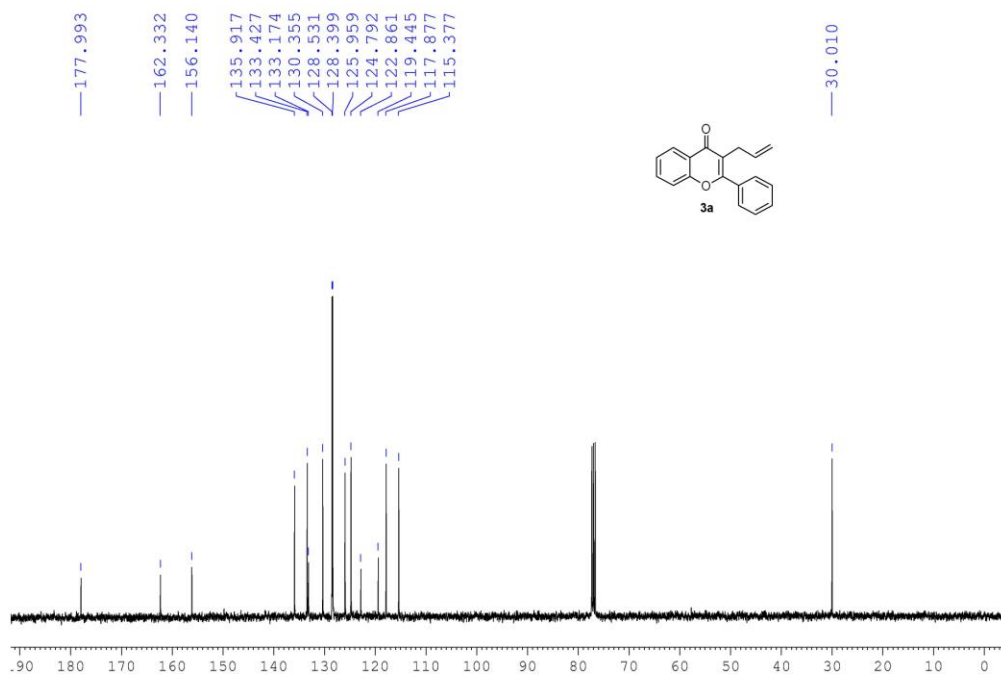

### $^1\text{H}$ NMR spectrum of **3b**

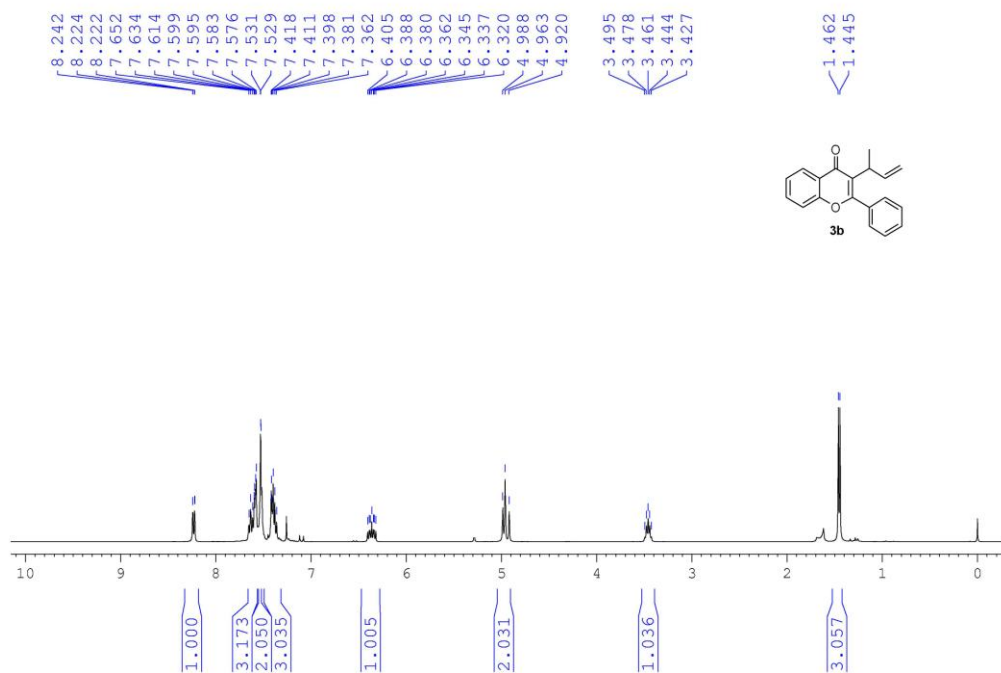

### $^{13}\text{C}$ NMR spectrum of **3b**

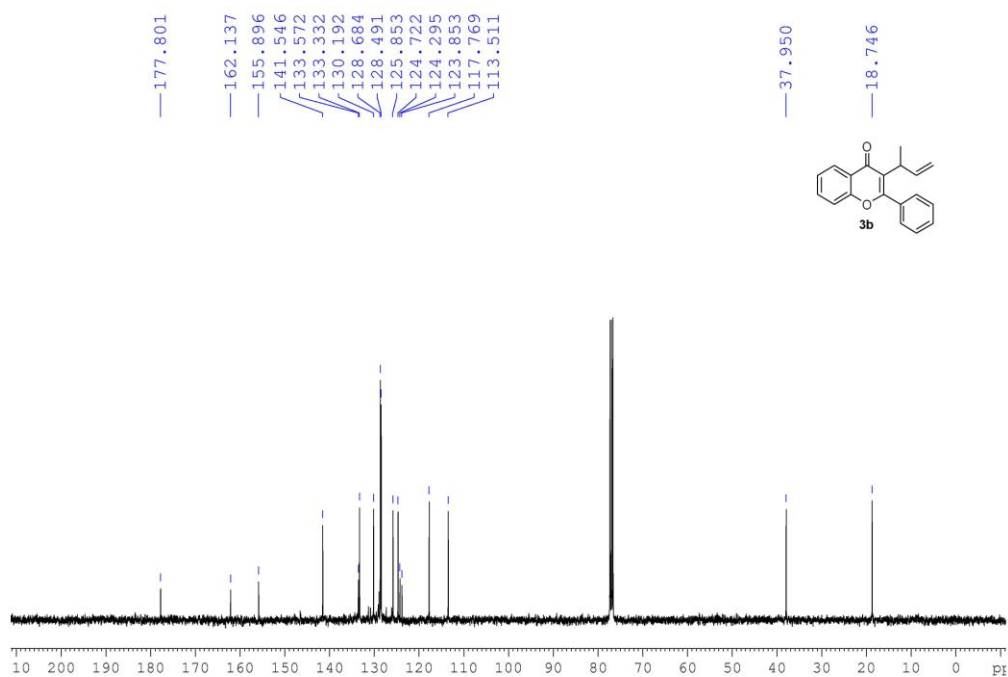

### $^1\text{H}$ NMR spectrum of **3c**

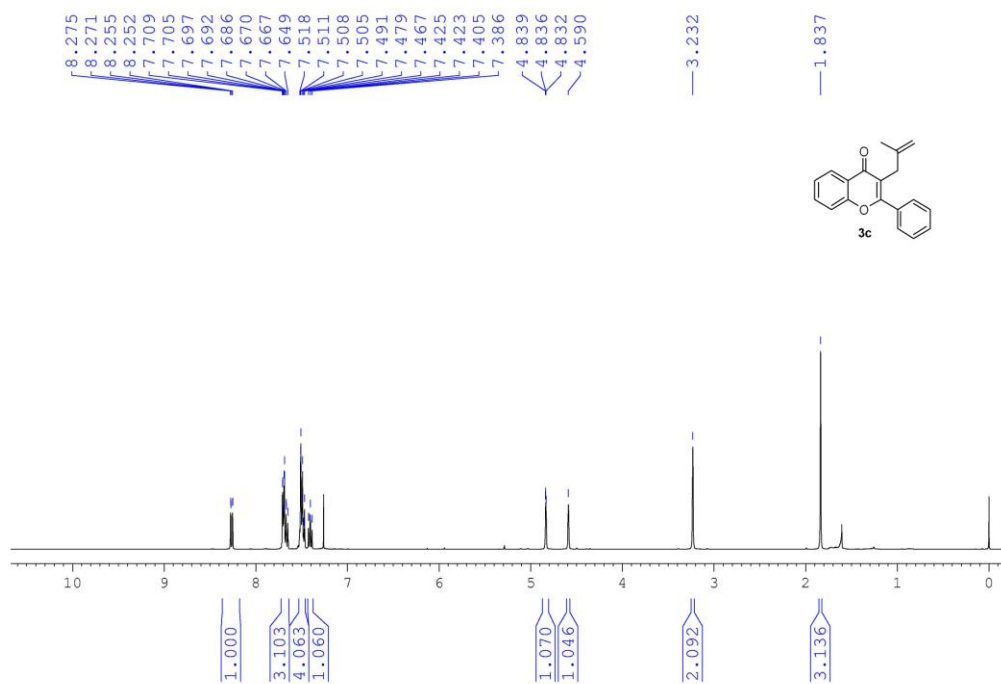

### $^{13}\text{C}$ NMR spectrum of **3c**

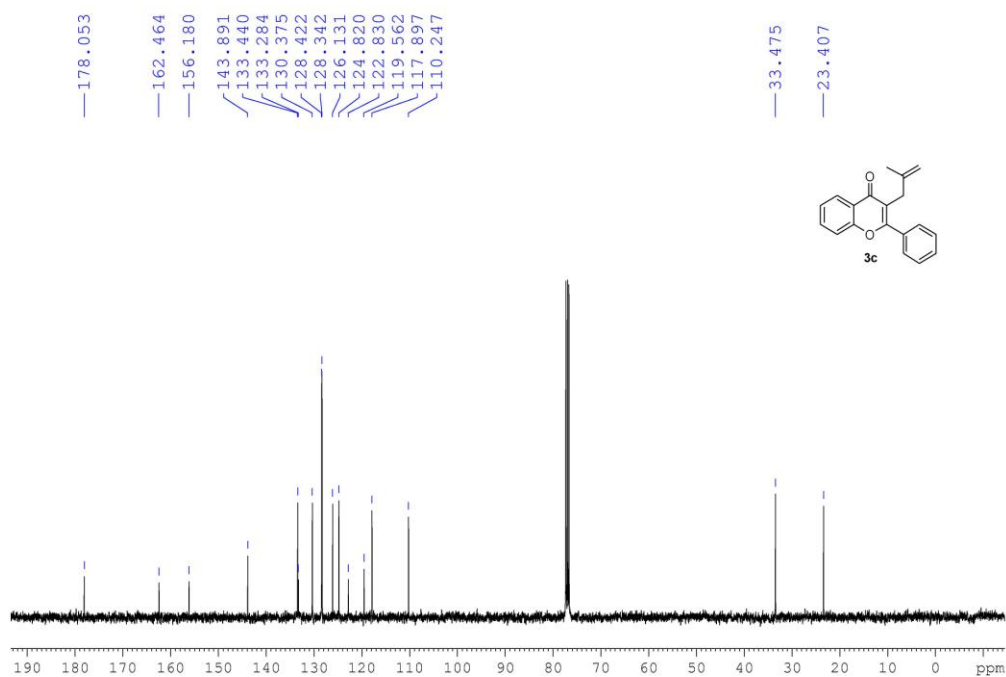

### $^1\text{H}$ NMR spectrum of **3d**

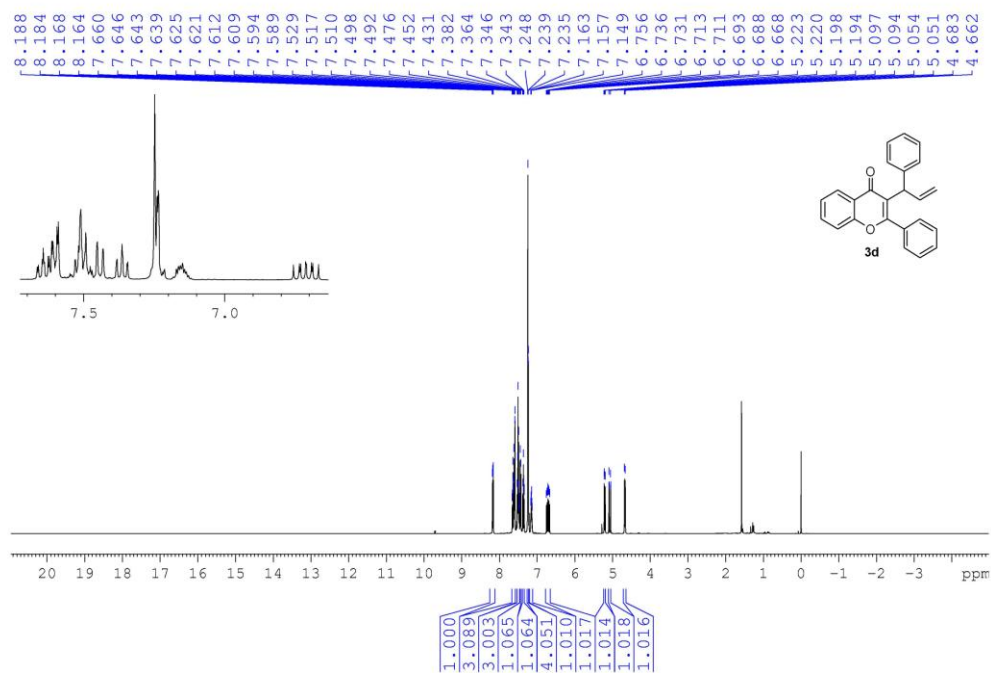

### $^{13}\text{C}$ NMR spectrum of **3d**

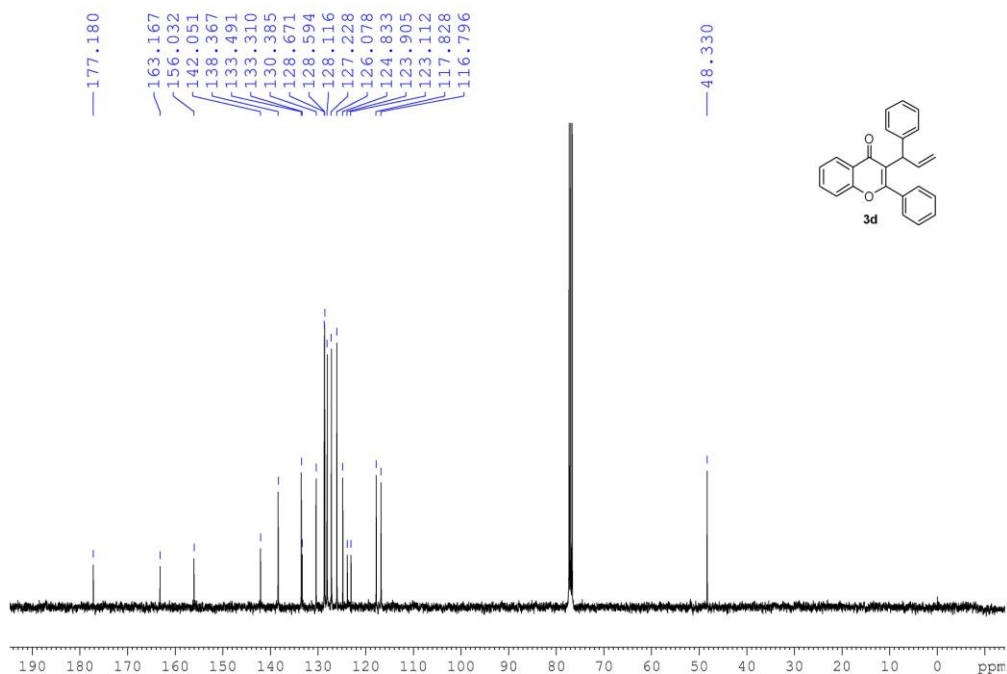



### $^1\text{H}$ NMR spectrum of **3e**

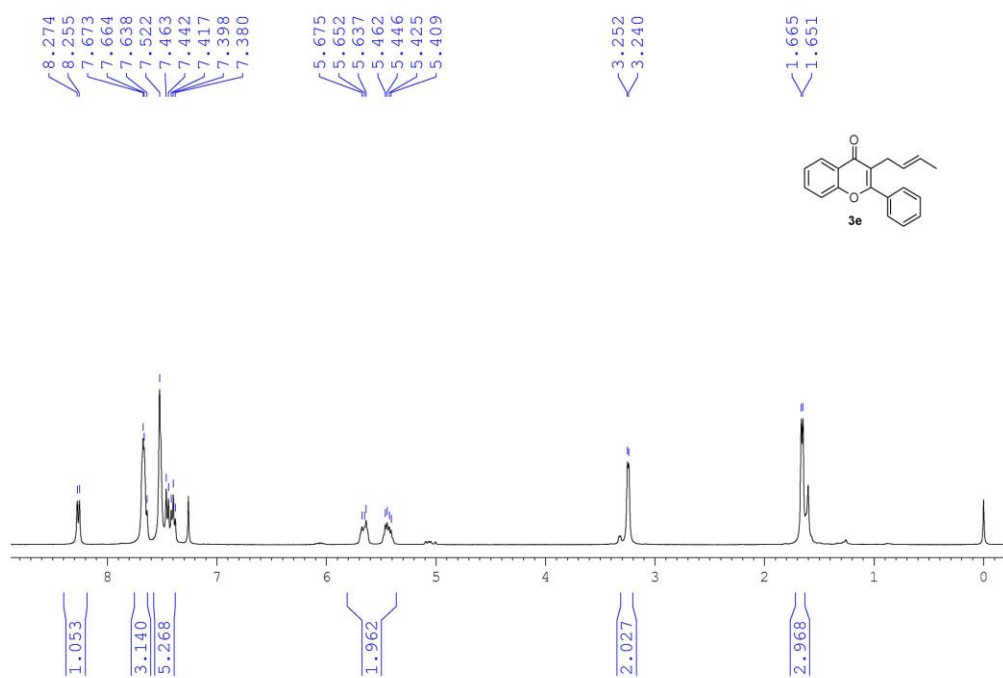

### $^{13}\text{C}$ NMR spectrum of **3e**

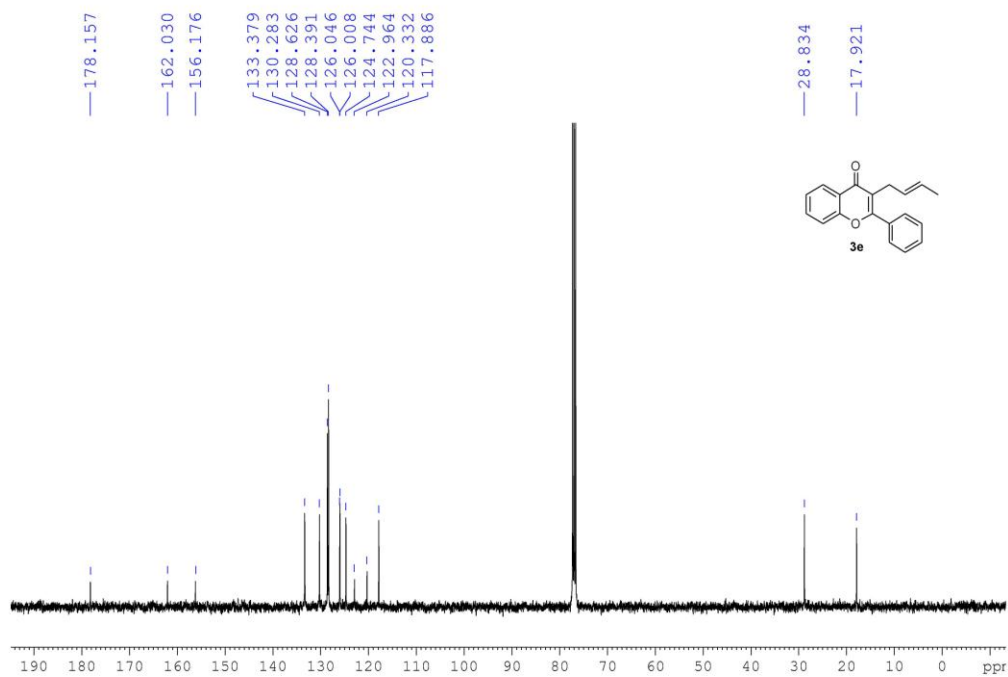

### $^1\text{H}$ NMR spectrum of **3f**

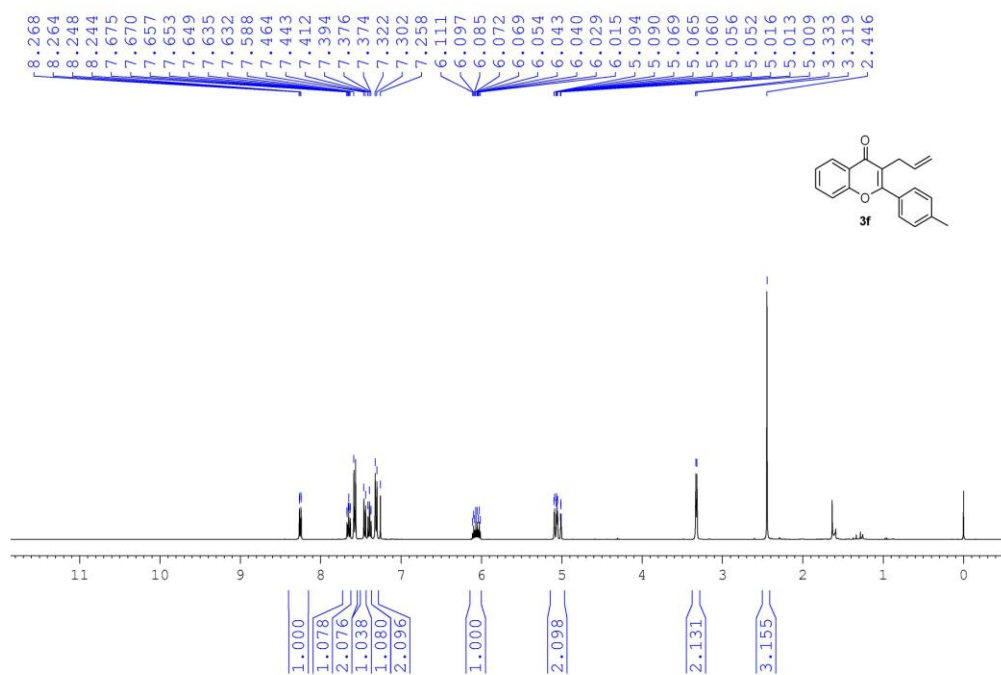

### $^{13}\text{C}$ NMR spectrum of **3f**

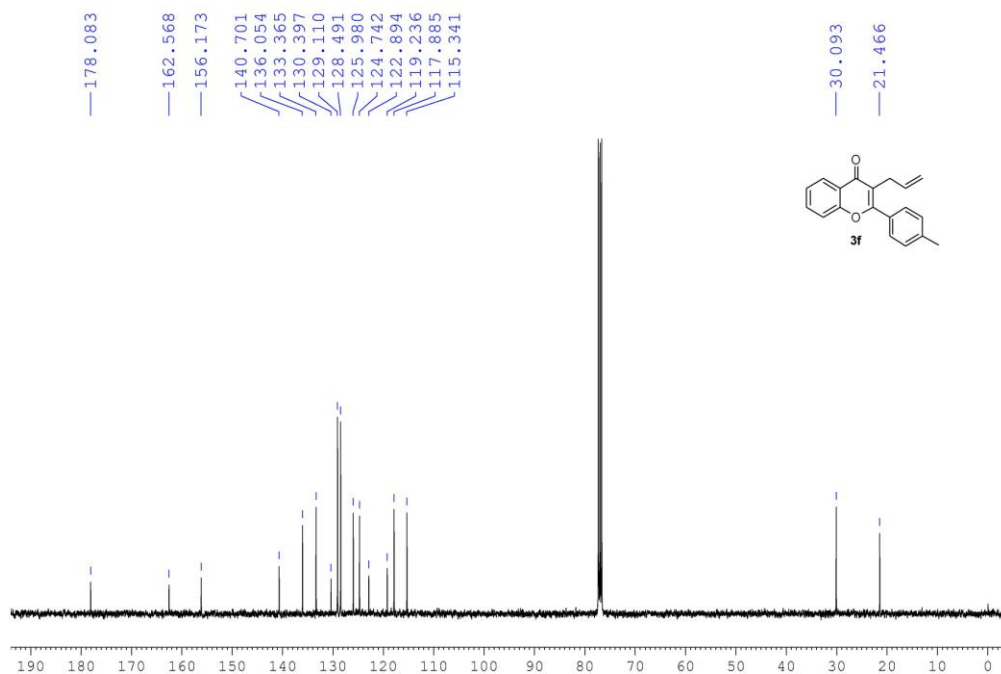

### $^1\text{H}$ NMR spectrum of **3g**

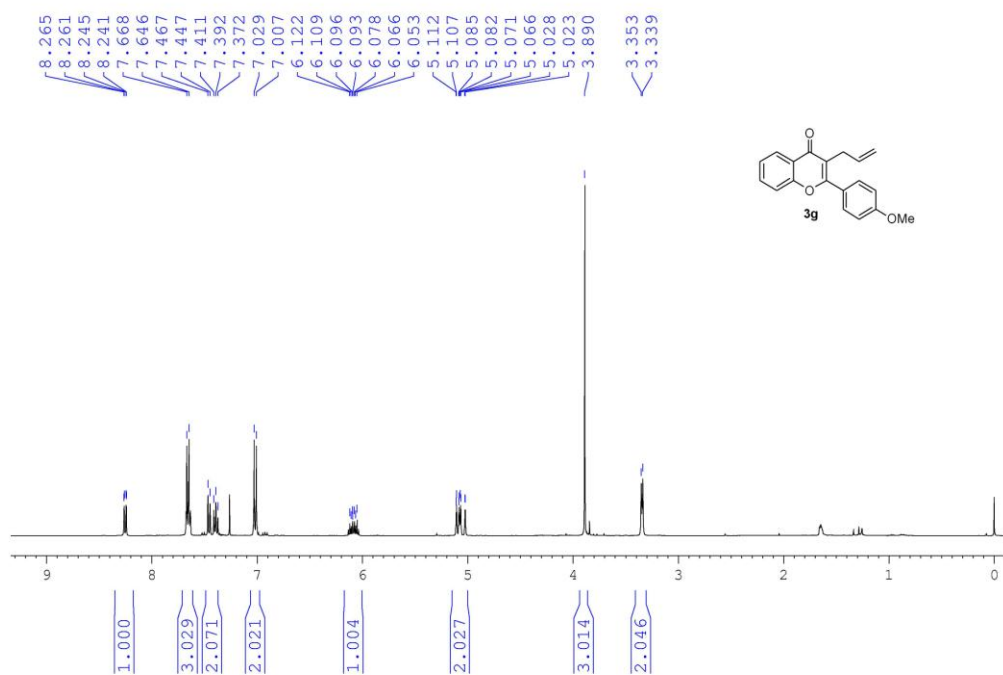

### $^{13}\text{C}$ NMR spectrum of **3g**

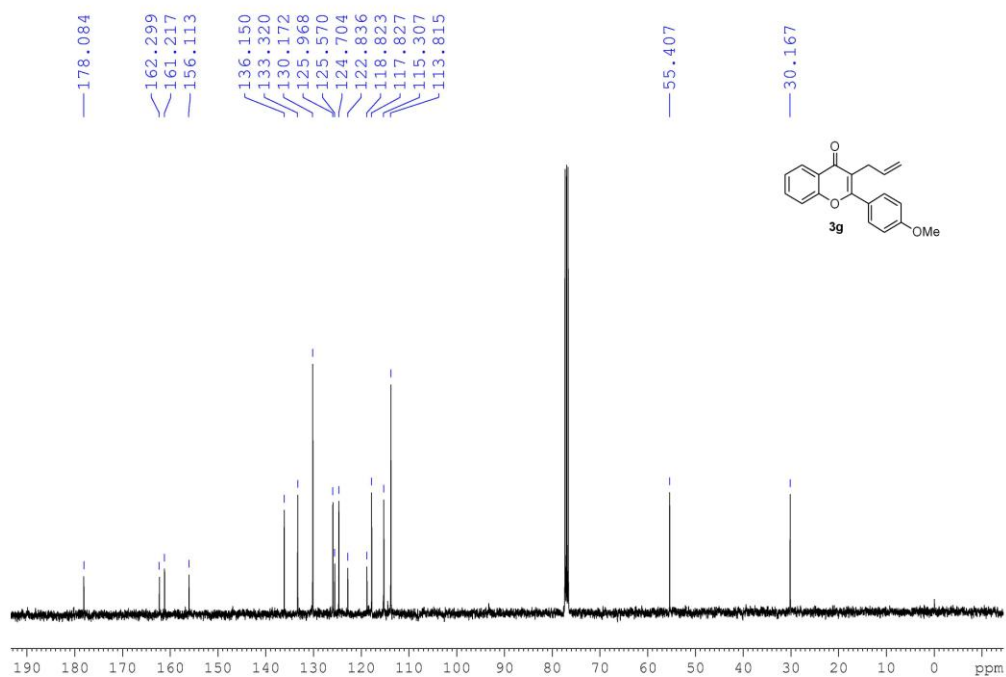

### $^1\text{H}$ NMR spectrum of **3h**

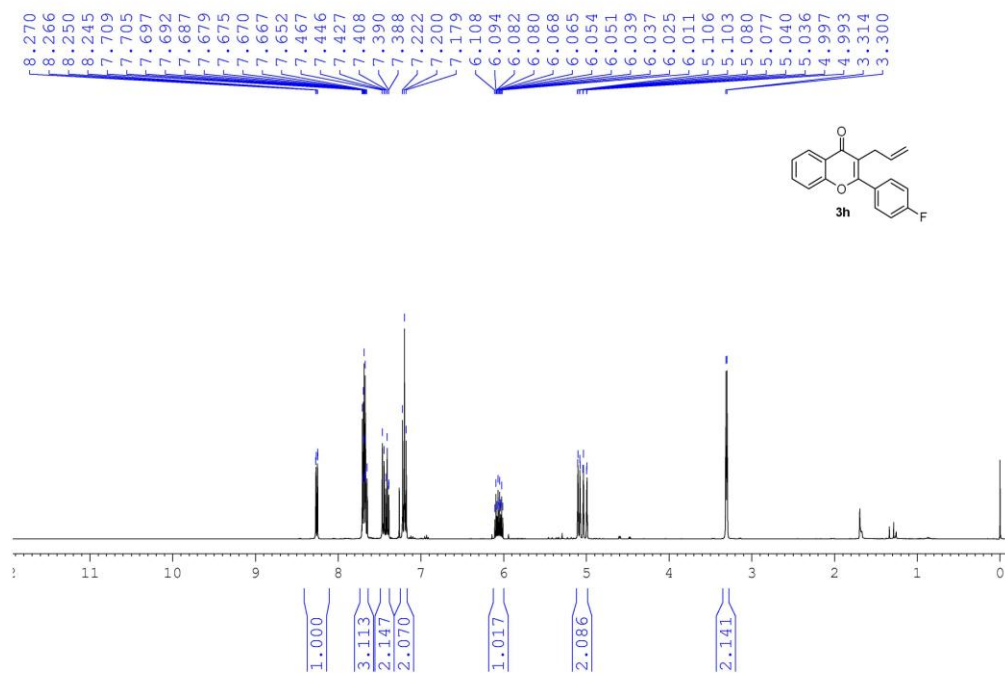

### $^{13}\text{C}$ NMR spectrum of **3h**

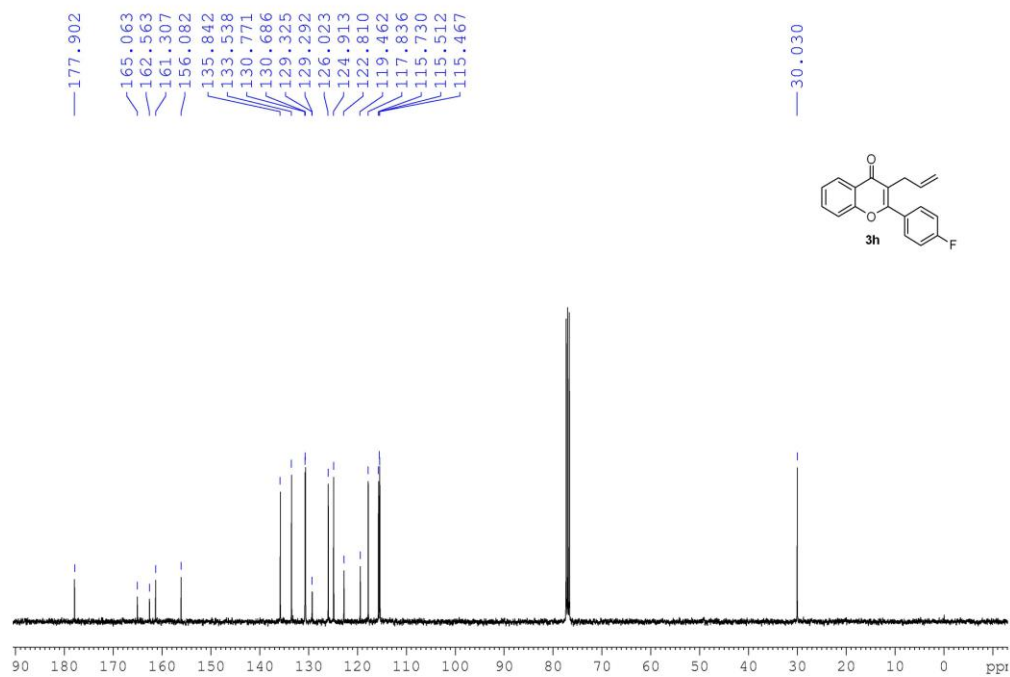

### $^1\text{H}$ NMR spectrum of **3i**

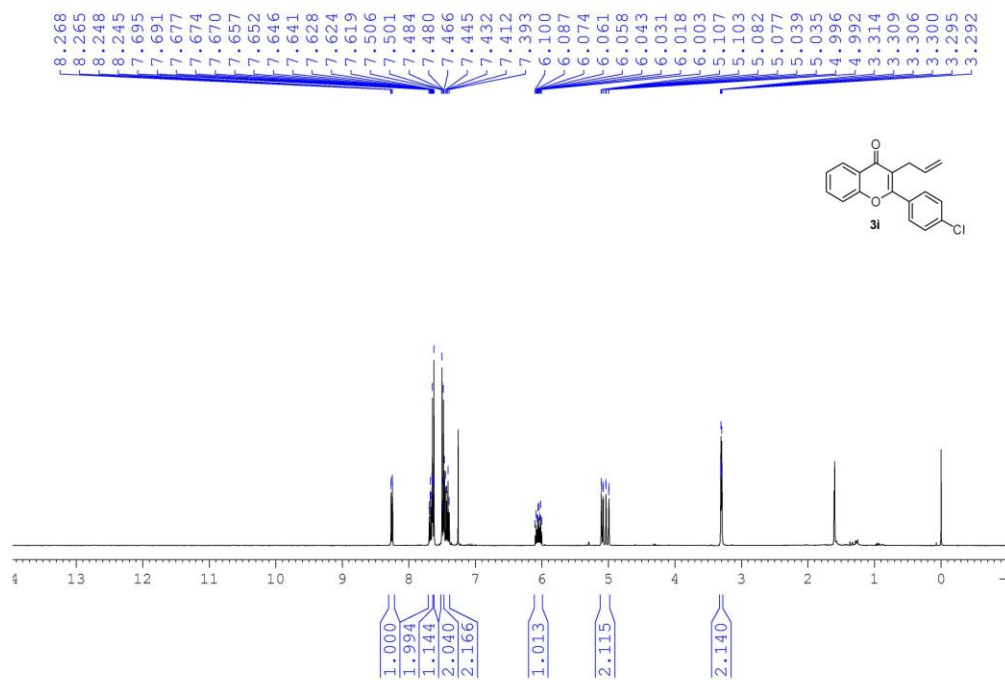

### $^{13}\text{C}$ NMR spectrum of **3i**

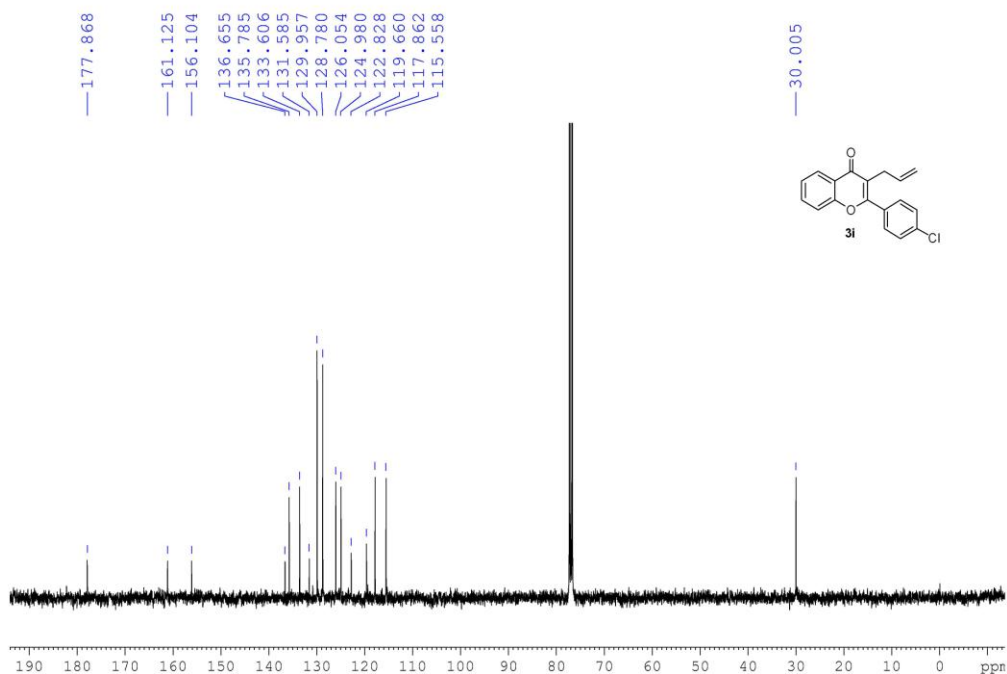

### $^1\text{H}$ NMR spectrum of **3j**

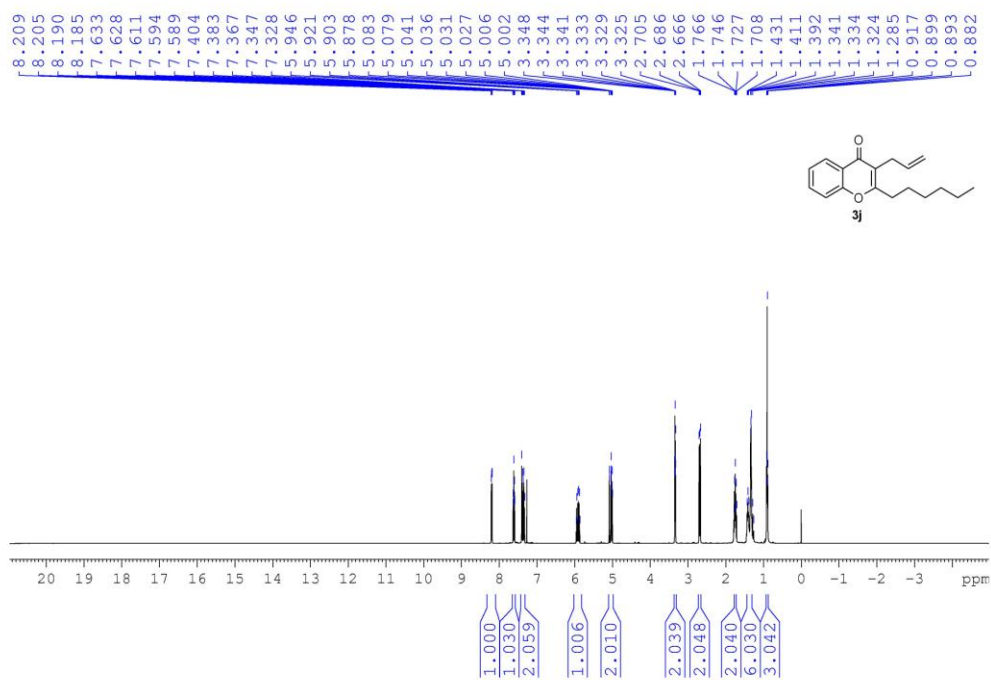

### $^{13}\text{C}$ NMR spectrum of **3j**

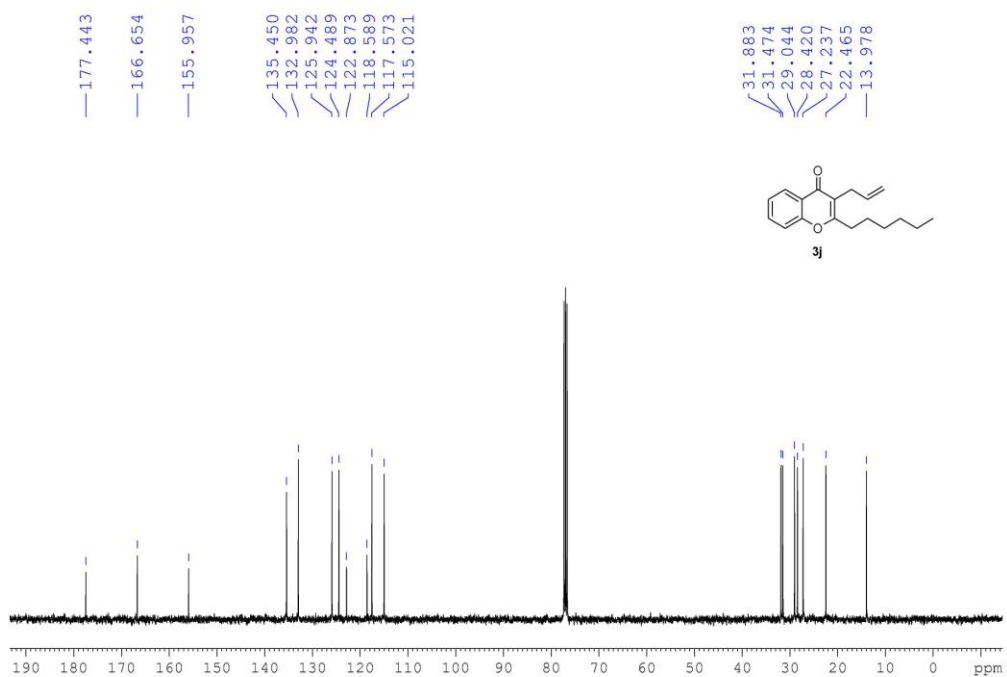

### $^1\text{H}$ NMR spectrum of **3k**

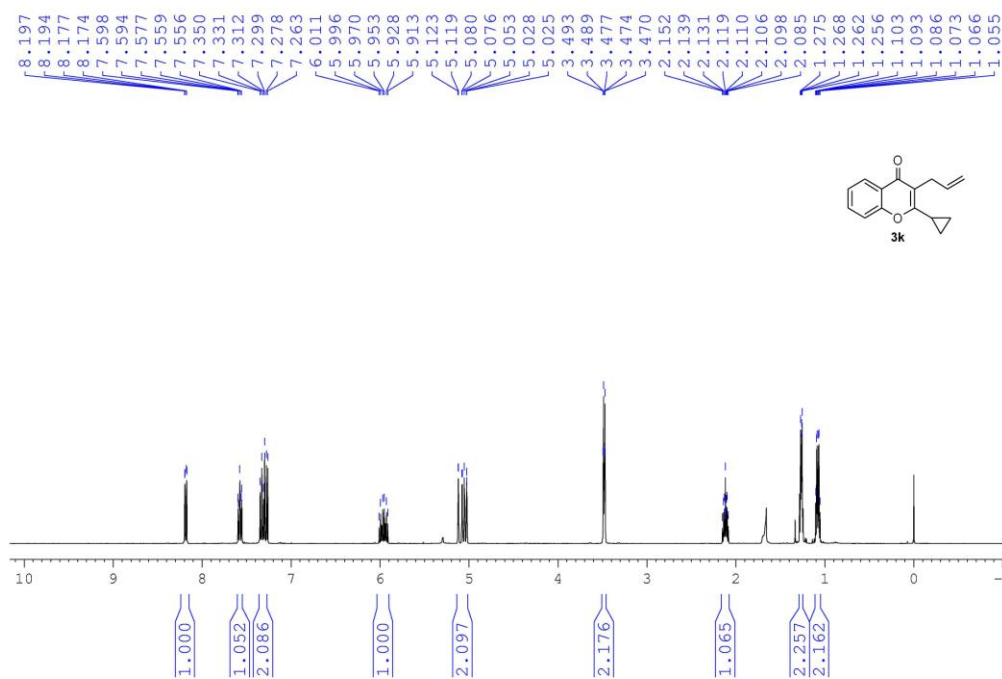

### $^{13}\text{C}$ NMR spectrum of **3k**

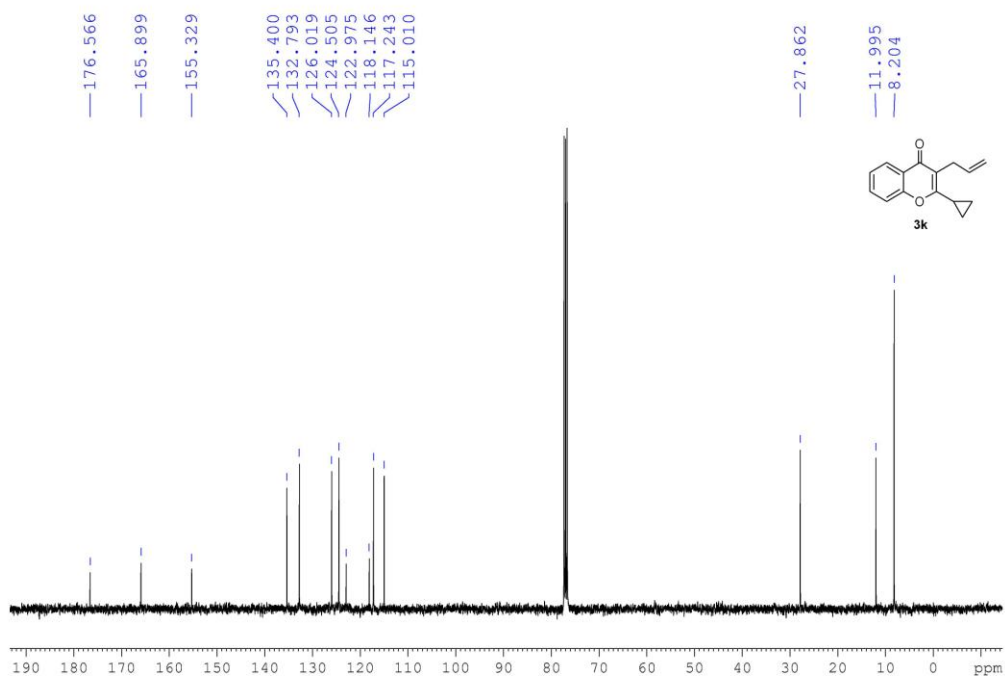



### $^1\text{H}$ NMR spectrum of **31**

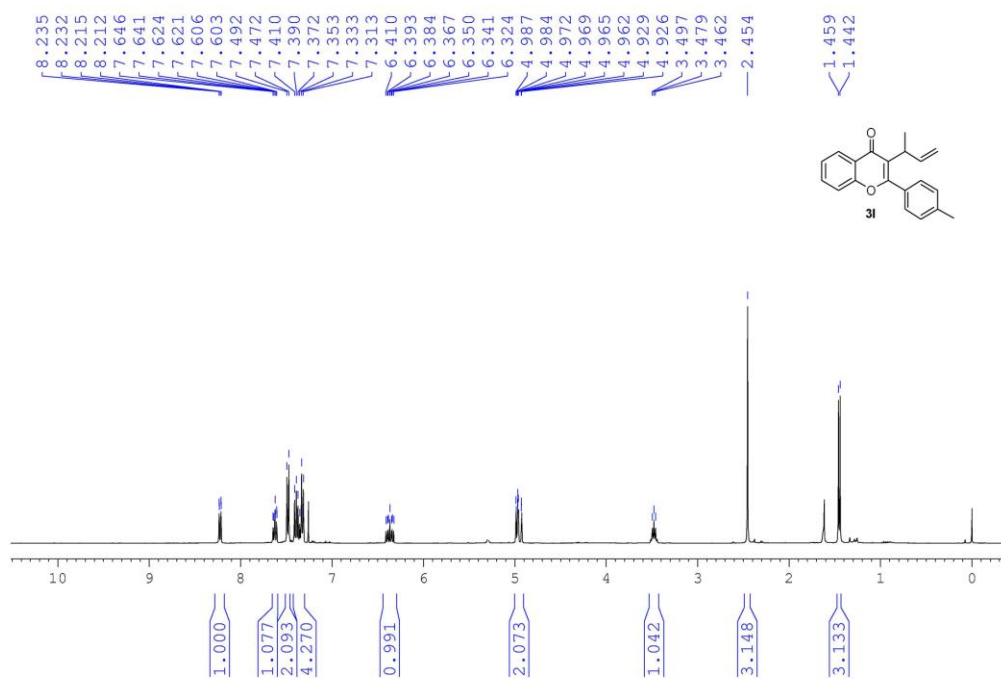

### $^{13}\text{C}$ NMR spectrum of **31**

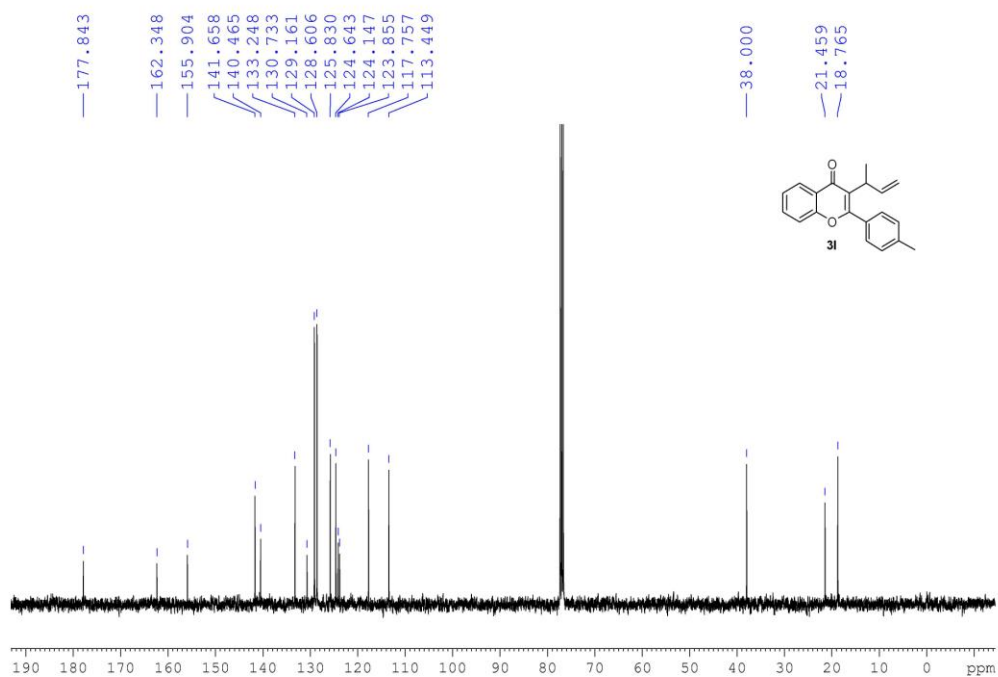

### $^1\text{H}$ NMR spectrum of **3m**

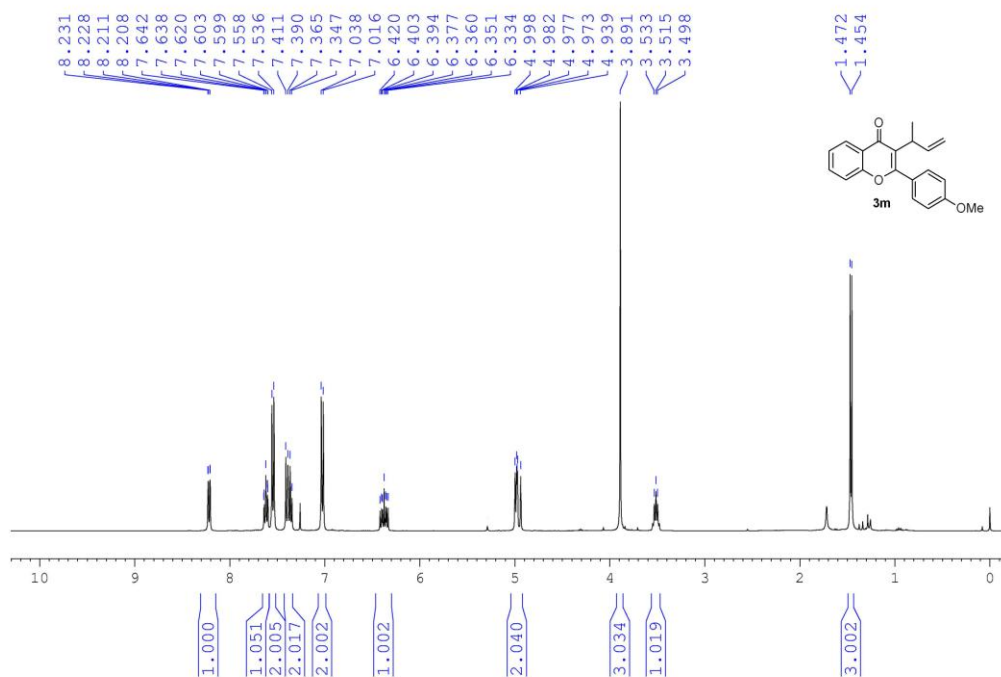

### $^{13}\text{C}$ NMR spectrum of **3m**

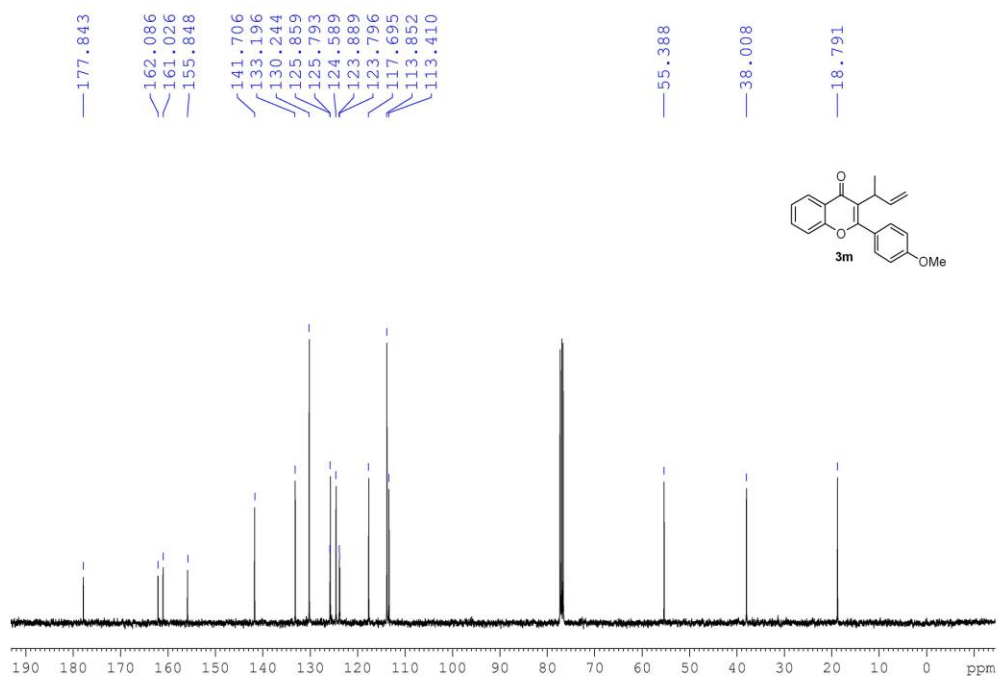

### $^1\text{H}$ NMR spectrum of **3n**

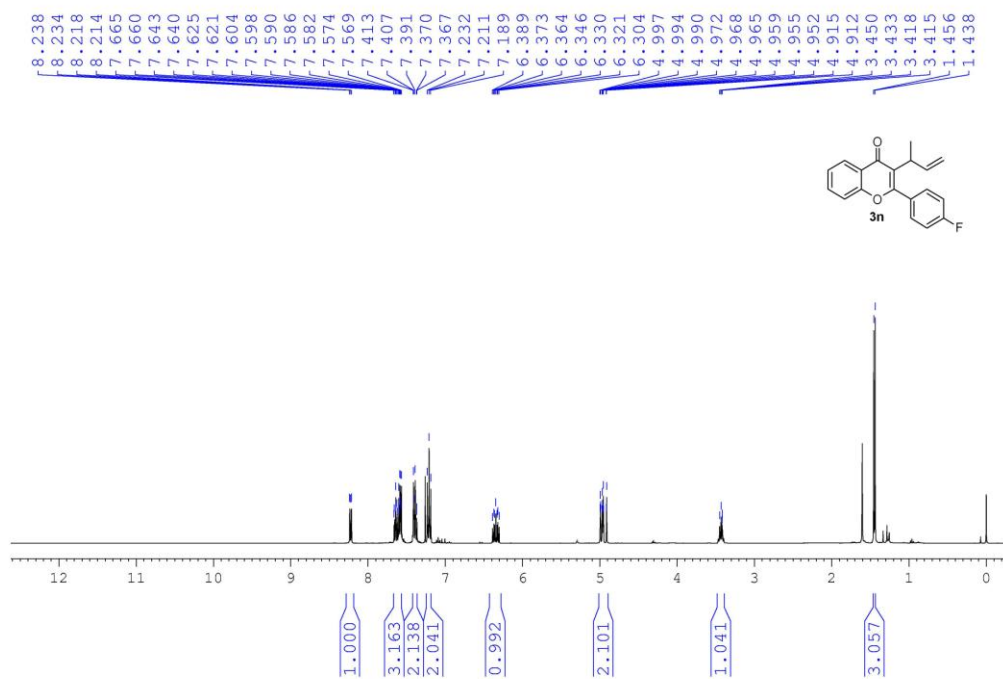

### $^{13}\text{C}$ NMR spectrum of **3n**

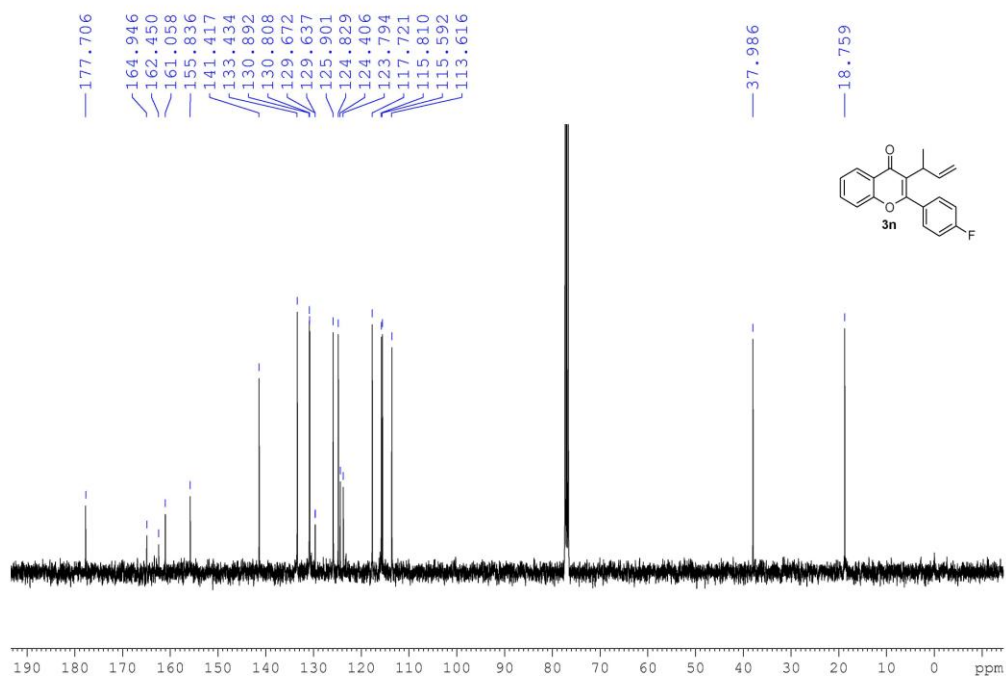

### $^1\text{H}$ NMR spectrum of **3o**

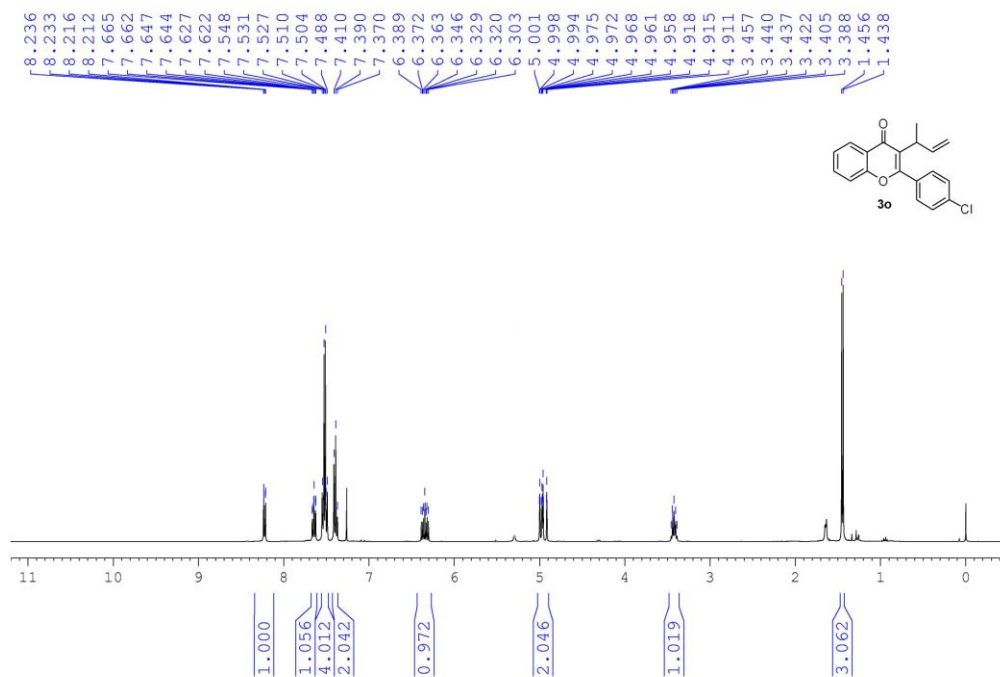

### $^{13}\text{C}$ NMR spectrum of **3o**

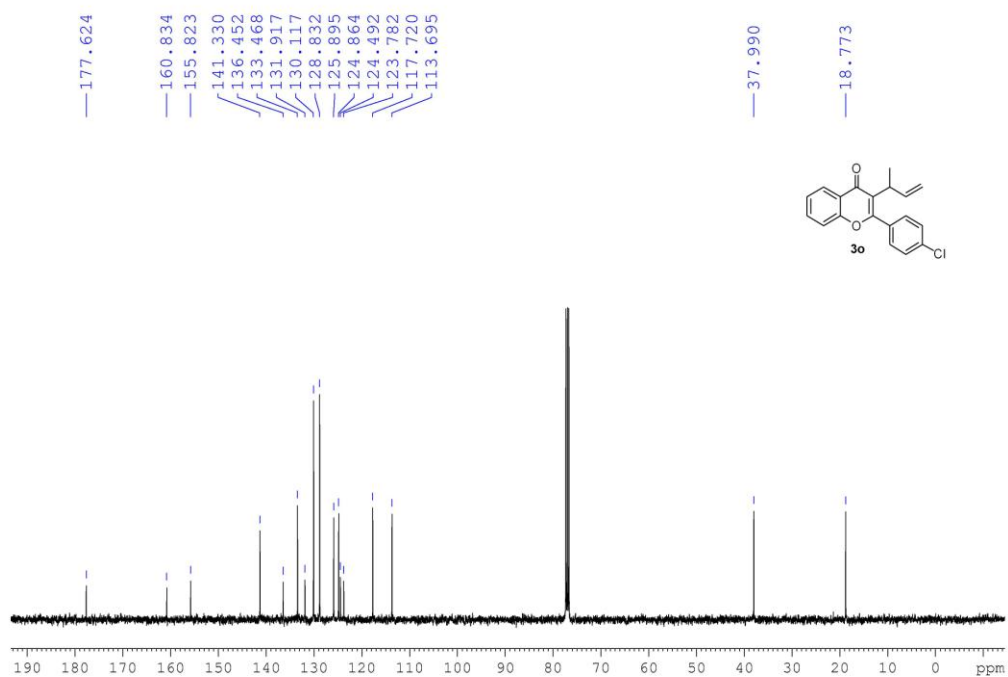

### $^1\text{H}$ NMR spectrum of **3p**

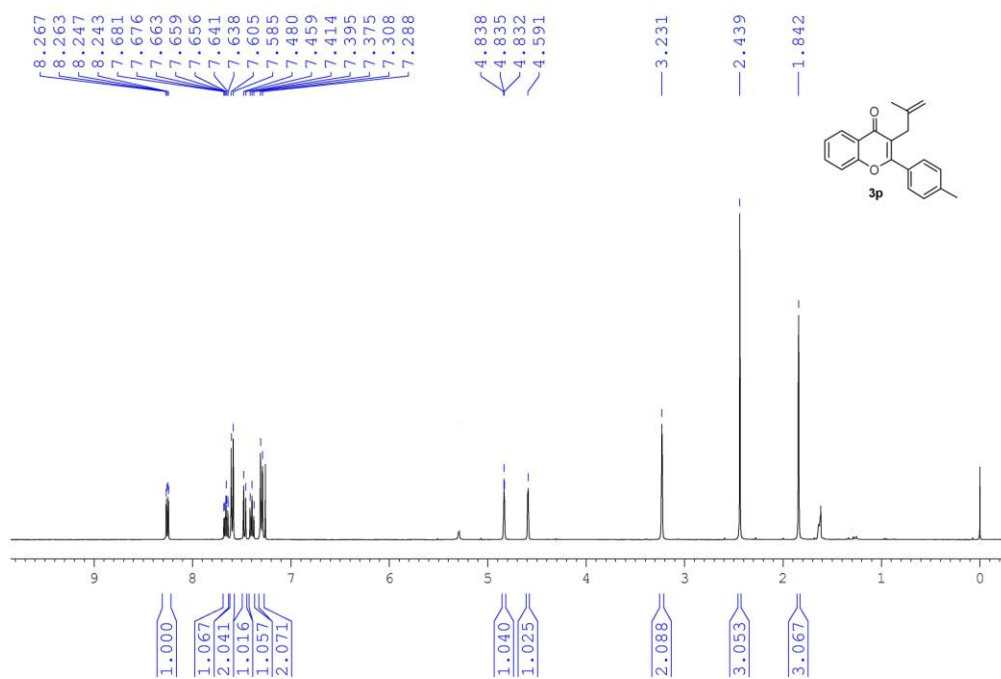

### $^{13}\text{C}$ NMR spectrum of **3p**

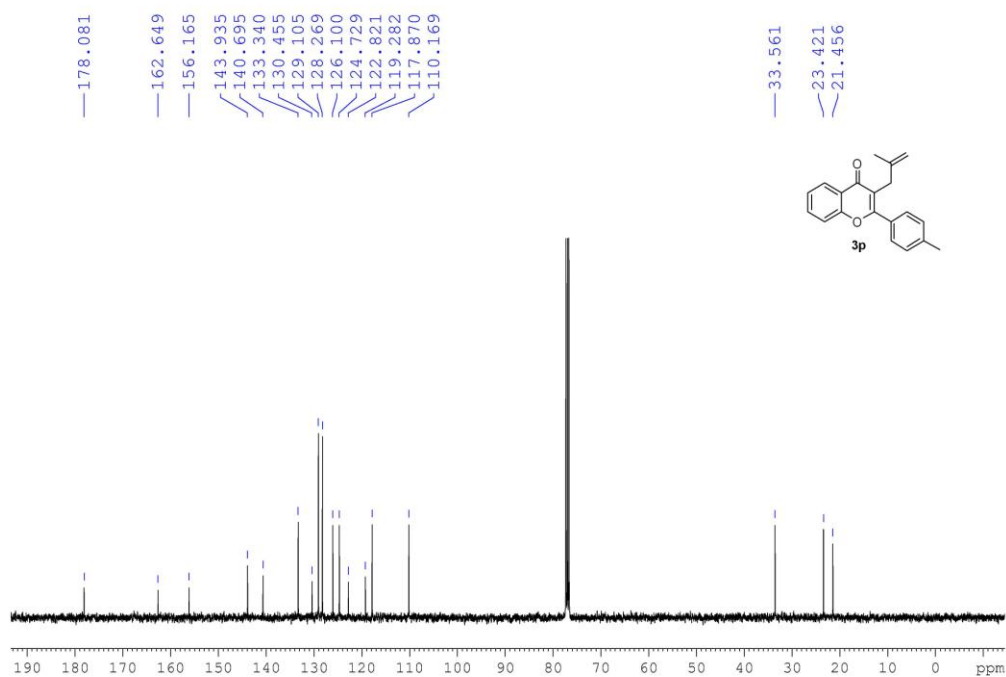

### $^1\text{H}$ NMR spectrum of **3q**

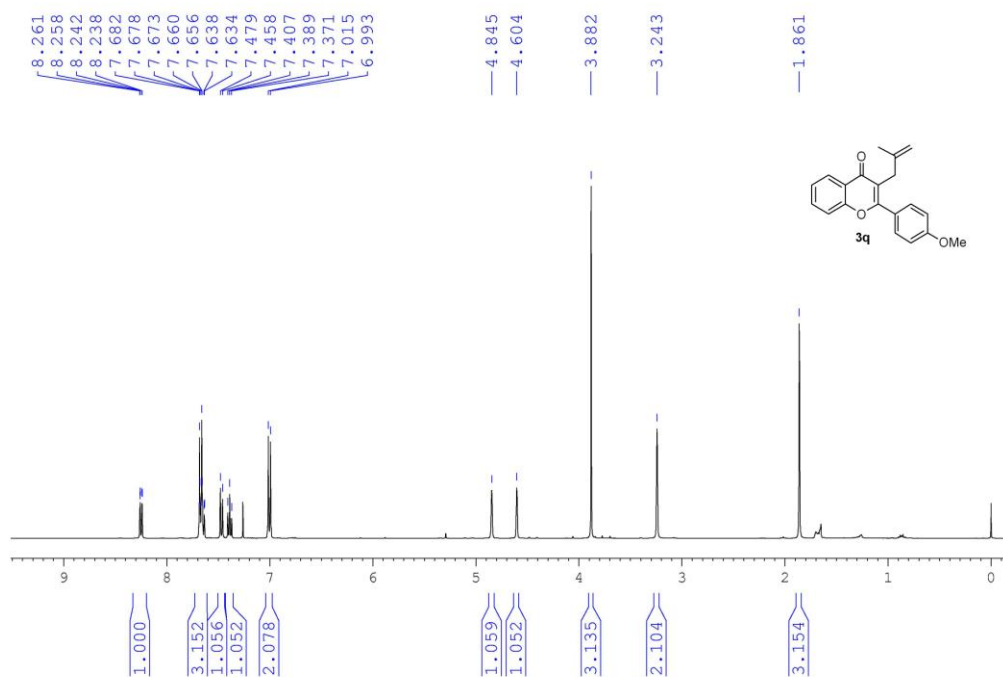

### $^{13}\text{C}$ NMR spectrum of **3q**

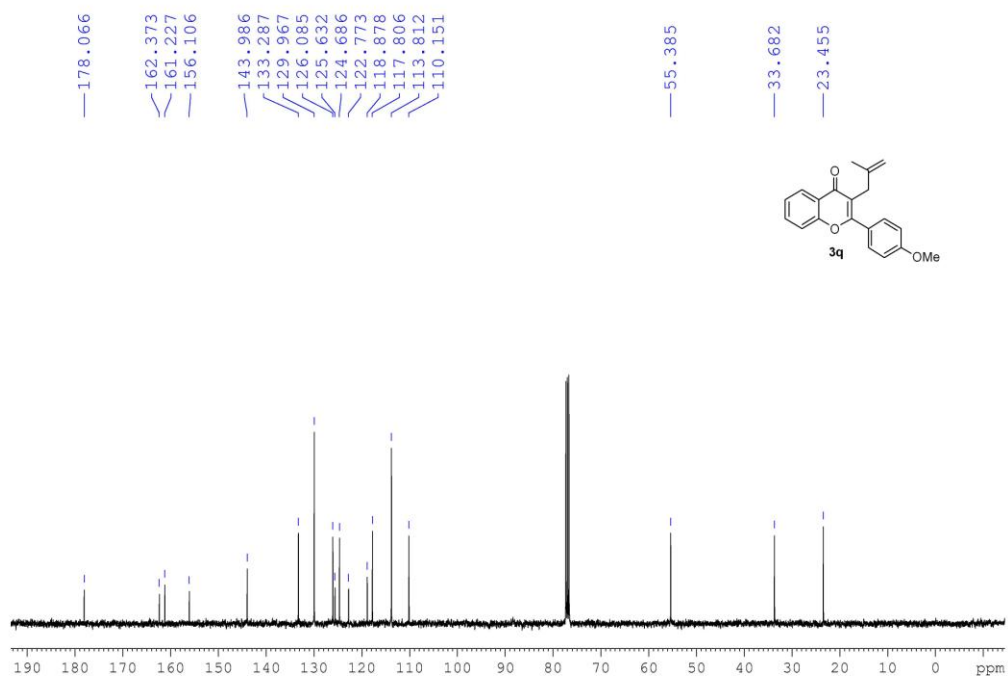

### $^1\text{H}$ NMR spectrum of **3r**

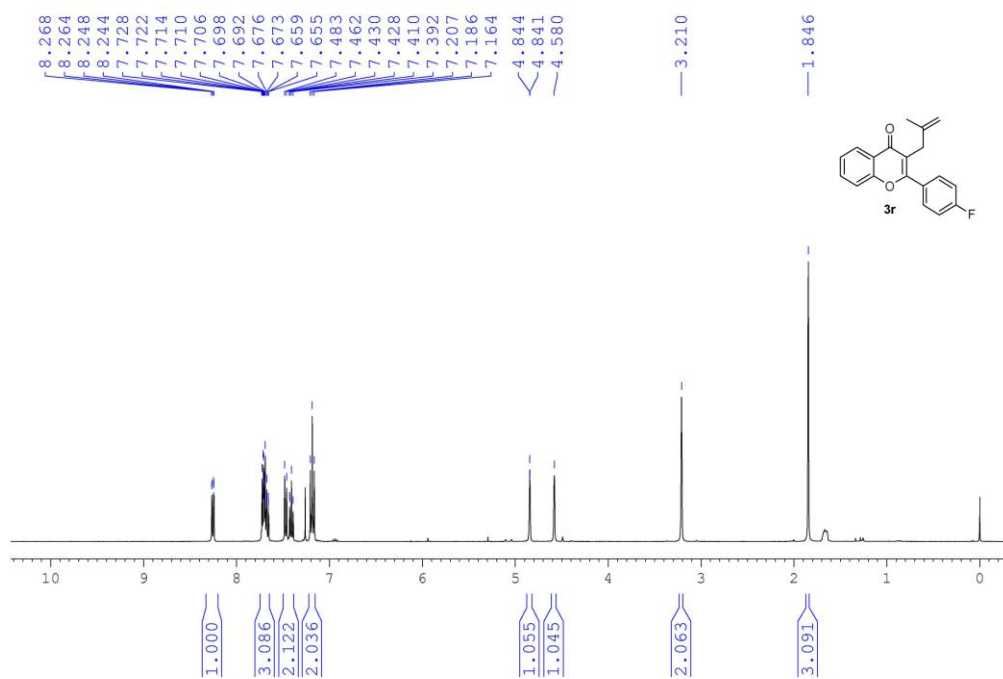

### $^{13}\text{C}$ NMR spectrum of **3r**

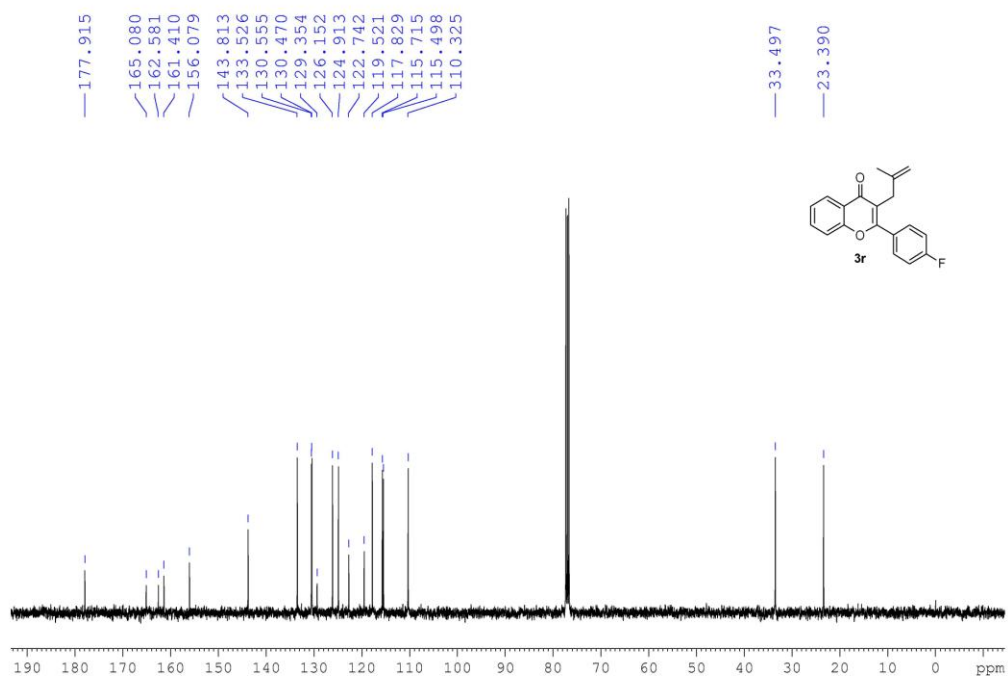



### $^1\text{H}$ NMR spectrum of **3s**

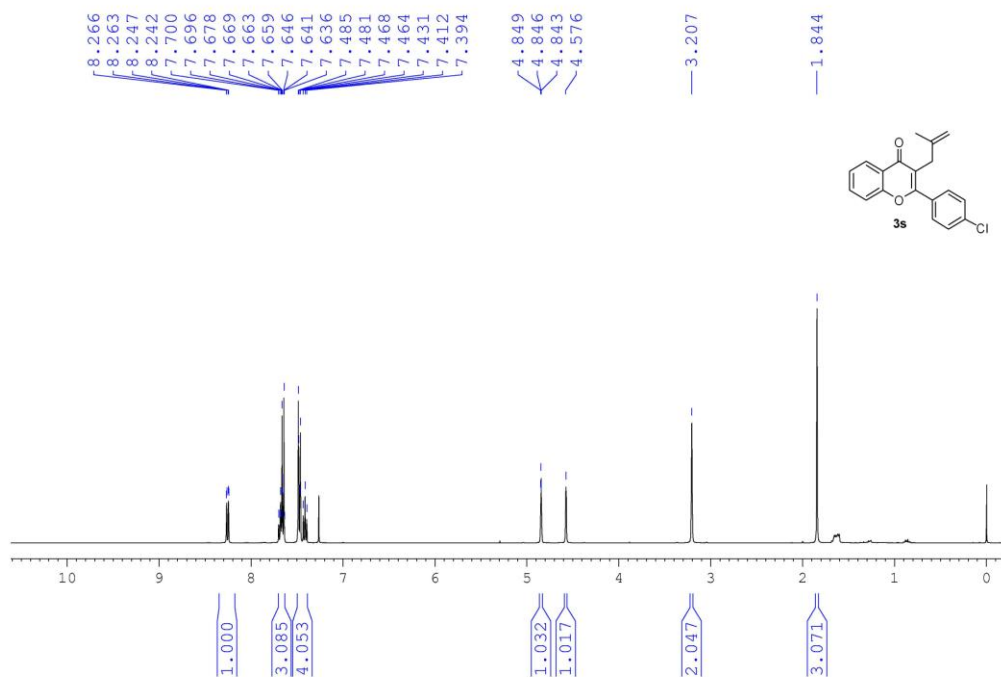

### $^{13}\text{C}$ NMR spectrum of **3s**

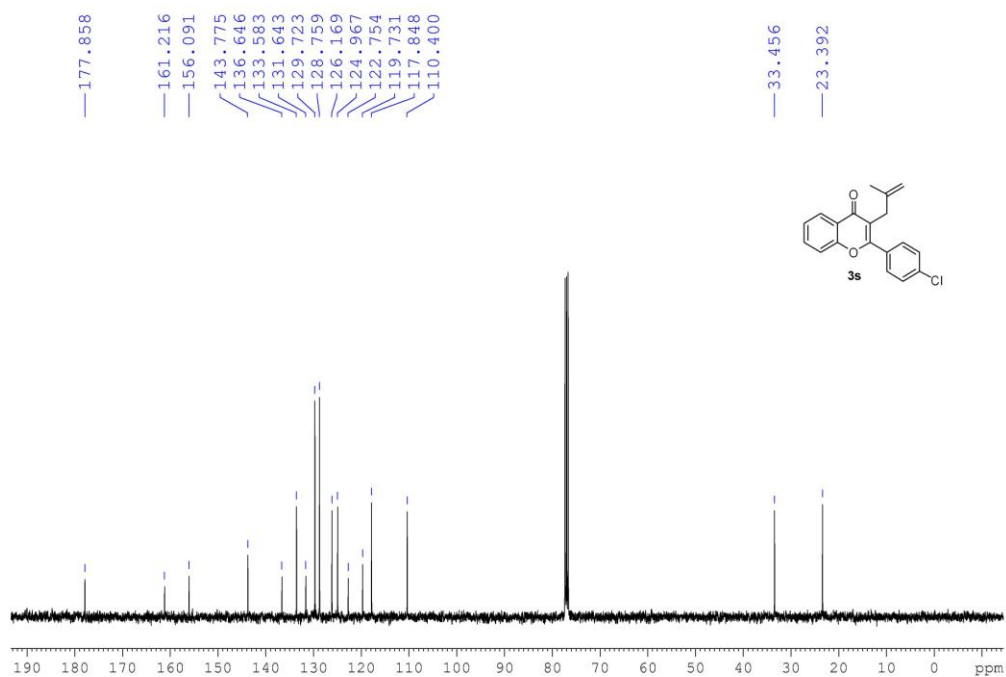

### $^1\text{H}$ NMR spectrum of **3t**

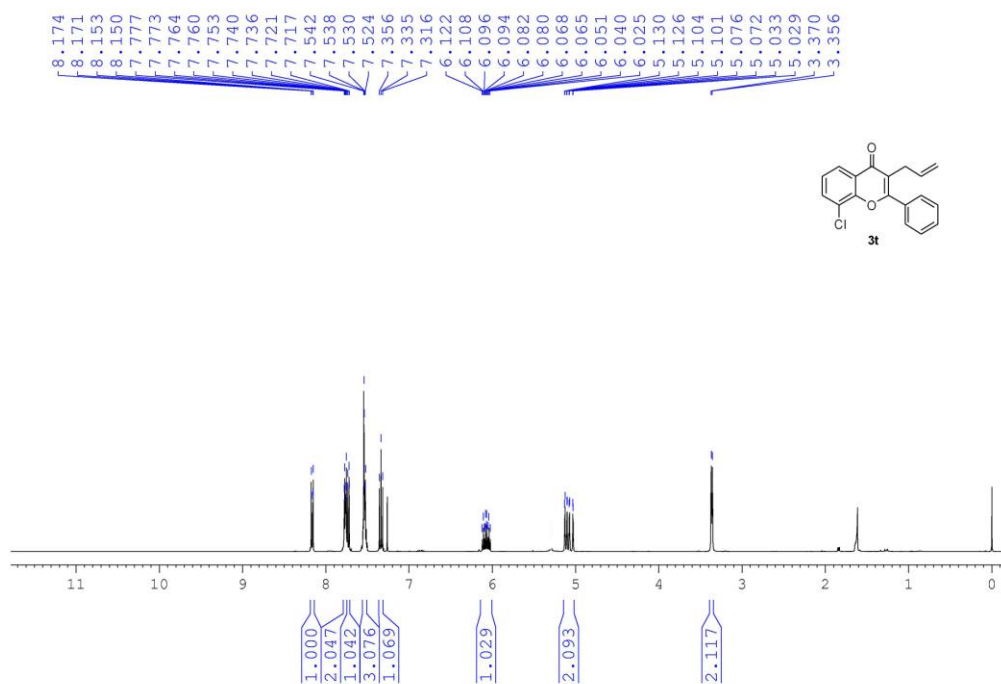

### $^{13}\text{C}$ NMR spectrum of **3t**

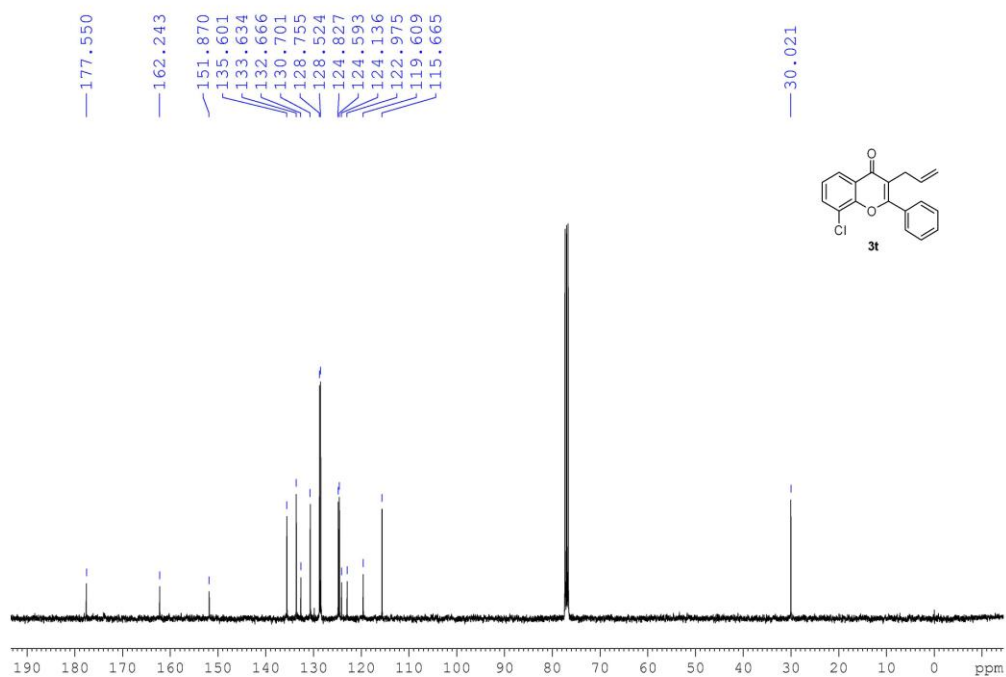

### $^1\text{H}$ NMR spectrum of **3u**

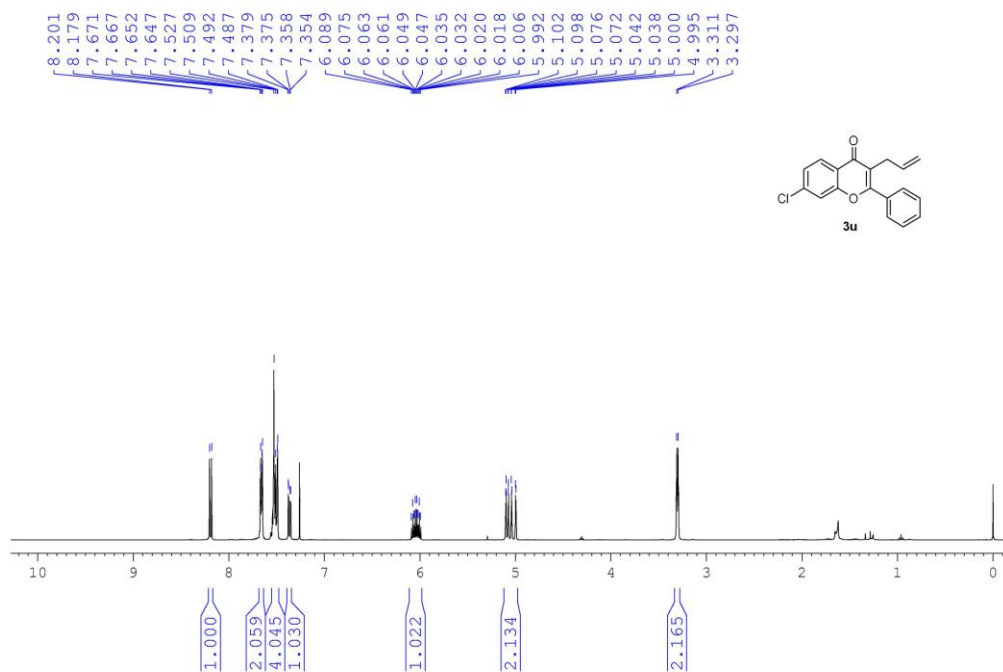

### $^{13}\text{C}$ NMR spectrum of **3u**

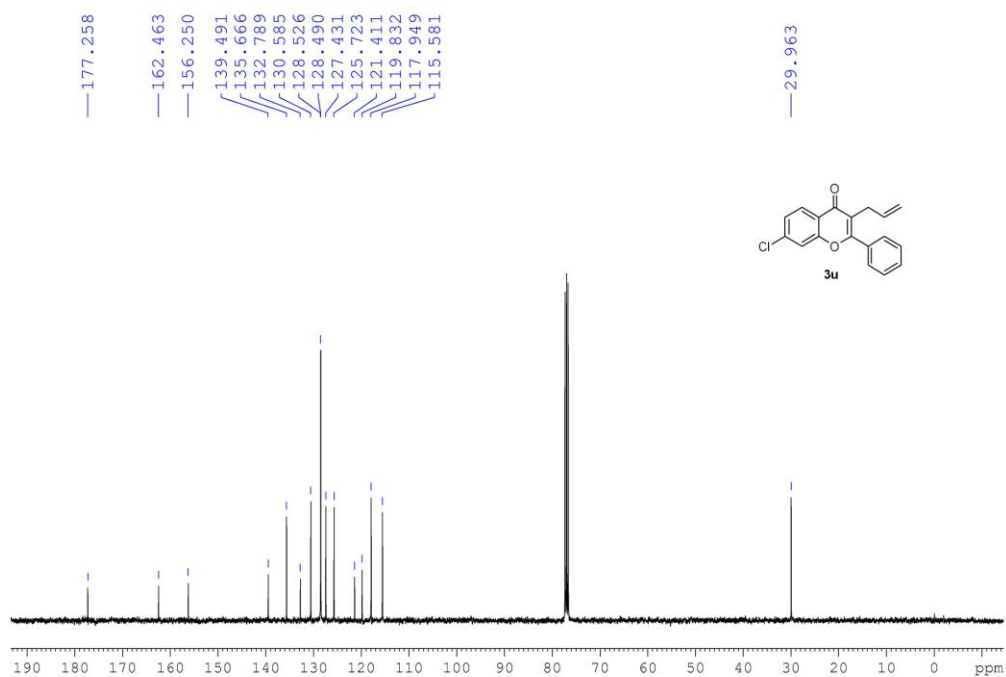

Supplement: c3cc48259f.pdf [file c3cc48259f.pdf]
